# Supplementary material for: Single-cell transcriptome analysis illuminating the characteristics of species-specific innate immune responses against viral infections
Source: PubMed Central journal article supplement (PMC10580374; doi:10.1093/gigascience/giad086), 2023-10-17
Supplement: giad086_giga-d-23-00007_original_submission.pdf [file giad086_giga-d-23-00007_original_submission.pdf]

# GigaScience

## Single-cell transcriptome analysis illuminating the characteristics of species-specific innate immune responses against viral infections

--Manuscript Draft--

|                                                                               |                                                                                                                                                                                                                                                                                                                                                                                                                                                                                                                                                                                                                                                                                                                                                                                                                                                                                                                                                                                                                                                                                                        |                    |
|-------------------------------------------------------------------------------|--------------------------------------------------------------------------------------------------------------------------------------------------------------------------------------------------------------------------------------------------------------------------------------------------------------------------------------------------------------------------------------------------------------------------------------------------------------------------------------------------------------------------------------------------------------------------------------------------------------------------------------------------------------------------------------------------------------------------------------------------------------------------------------------------------------------------------------------------------------------------------------------------------------------------------------------------------------------------------------------------------------------------------------------------------------------------------------------------------|--------------------|
| <b>Manuscript Number:</b>                                                     | GIGA-D-23-00007                                                                                                                                                                                                                                                                                                                                                                                                                                                                                                                                                                                                                                                                                                                                                                                                                                                                                                                                                                                                                                                                                        |                    |
| <b>Full Title:</b>                                                            | Single-cell transcriptome analysis illuminating the characteristics of species-specific innate immune responses against viral infections                                                                                                                                                                                                                                                                                                                                                                                                                                                                                                                                                                                                                                                                                                                                                                                                                                                                                                                                                               |                    |
| <b>Article Type:</b>                                                          | Research                                                                                                                                                                                                                                                                                                                                                                                                                                                                                                                                                                                                                                                                                                                                                                                                                                                                                                                                                                                                                                                                                               |                    |
| <b>Funding Information:</b>                                                   | Japan Science and Technology Corporation (CREST JPMJCR20H4)                                                                                                                                                                                                                                                                                                                                                                                                                                                                                                                                                                                                                                                                                                                                                                                                                                                                                                                                                                                                                                            | Professor Kei Sato |
| <b>Abstract:</b>                                                              | <p>Bats harbor various viruses without severe symptoms and act as their natural reservoirs. The tolerance of bats against viral infections is assumed to originate from the uniqueness of their immune system. However, how immune responses vary between primates and bats remains unclear. Here, we characterized differences in the immune responses by peripheral blood mononuclear cells to various pathogenic stimuli between primates (humans, chimpanzees, and macaques) and bats (Egyptian fruit bats) using single-cell RNA sequencing. We show that the induction patterns of key cytosolic DNA/RNA sensors and antiviral genes differed between primates and bats. A novel subset of monocytes induced by pathogenic stimuli specifically in bats was identified. Furthermore, bats robustly respond to DNA virus infection even though major DNA sensors are dampened in bats. Overall, our data suggest that immune responses are substantially different between primates and bats, presumably underlying the difference in viral pathogenicity among the mammalian species tested.</p> |                    |
| <b>Corresponding Author:</b>                                                  | Kei Sato<br>Tokyo Daigaku<br>Minato-ku, Tokyo JAPAN                                                                                                                                                                                                                                                                                                                                                                                                                                                                                                                                                                                                                                                                                                                                                                                                                                                                                                                                                                                                                                                    |                    |
| <b>Corresponding Author Secondary Information:</b>                            |                                                                                                                                                                                                                                                                                                                                                                                                                                                                                                                                                                                                                                                                                                                                                                                                                                                                                                                                                                                                                                                                                                        |                    |
| <b>Corresponding Author's Institution:</b>                                    | Tokyo Daigaku                                                                                                                                                                                                                                                                                                                                                                                                                                                                                                                                                                                                                                                                                                                                                                                                                                                                                                                                                                                                                                                                                          |                    |
| <b>Corresponding Author's Secondary Institution:</b>                          |                                                                                                                                                                                                                                                                                                                                                                                                                                                                                                                                                                                                                                                                                                                                                                                                                                                                                                                                                                                                                                                                                                        |                    |
| <b>First Author:</b>                                                          | Hirofumi Aso                                                                                                                                                                                                                                                                                                                                                                                                                                                                                                                                                                                                                                                                                                                                                                                                                                                                                                                                                                                                                                                                                           |                    |
| <b>First Author Secondary Information:</b>                                    |                                                                                                                                                                                                                                                                                                                                                                                                                                                                                                                                                                                                                                                                                                                                                                                                                                                                                                                                                                                                                                                                                                        |                    |
| <b>Order of Authors:</b>                                                      | Hirofumi Aso<br>Jumpei Ito<br>Haruka Ozaki<br>Yukie Kashima<br>Yutaka Suzuki<br>Yoshio Koyanagi<br>Kei Sato                                                                                                                                                                                                                                                                                                                                                                                                                                                                                                                                                                                                                                                                                                                                                                                                                                                                                                                                                                                            |                    |
| <b>Order of Authors Secondary Information:</b>                                |                                                                                                                                                                                                                                                                                                                                                                                                                                                                                                                                                                                                                                                                                                                                                                                                                                                                                                                                                                                                                                                                                                        |                    |
| <b>Additional Information:</b>                                                |                                                                                                                                                                                                                                                                                                                                                                                                                                                                                                                                                                                                                                                                                                                                                                                                                                                                                                                                                                                                                                                                                                        |                    |
| <b>Question</b>                                                               | <b>Response</b>                                                                                                                                                                                                                                                                                                                                                                                                                                                                                                                                                                                                                                                                                                                                                                                                                                                                                                                                                                                                                                                                                        |                    |
| Are you submitting this manuscript to a special series or article collection? | No                                                                                                                                                                                                                                                                                                                                                                                                                                                                                                                                                                                                                                                                                                                                                                                                                                                                                                                                                                                                                                                                                                     |                    |
| <b>Experimental design and statistics</b>                                     | Yes                                                                                                                                                                                                                                                                                                                                                                                                                                                                                                                                                                                                                                                                                                                                                                                                                                                                                                                                                                                                                                                                                                    |                    |

|                                                                                                                                                                                                                                                                                                                                                                                                                                                                                                                                                         |            |
|---------------------------------------------------------------------------------------------------------------------------------------------------------------------------------------------------------------------------------------------------------------------------------------------------------------------------------------------------------------------------------------------------------------------------------------------------------------------------------------------------------------------------------------------------------|------------|
| <p>Full details of the experimental design and statistical methods used should be given in the Methods section, as detailed in our <a href="#">Minimum Standards Reporting Checklist</a>. Information essential to interpreting the data presented should be made available in the figure legends.</p> <p>Have you included all the information requested in your manuscript?</p>                                                                                                                                                                       |            |
| <p><b>Resources</b></p> <p>A description of all resources used, including antibodies, cell lines, animals and software tools, with enough information to allow them to be uniquely identified, should be included in the Methods section. Authors are strongly encouraged to cite <a href="#">Research Resource Identifiers</a> (RRIDs) for antibodies, model organisms and tools, where possible.</p> <p>Have you included the information requested as detailed in our <a href="#">Minimum Standards Reporting Checklist</a>?</p>                     | <p>Yes</p> |
| <p><b>Availability of data and materials</b></p> <p>All datasets and code on which the conclusions of the paper rely must be either included in your submission or deposited in <a href="#">publicly available repositories</a> (where available and ethically appropriate), referencing such data using a unique identifier in the references and in the “Availability of Data and Materials” section of your manuscript.</p> <p>Have you have met the above requirement as detailed in our <a href="#">Minimum Standards Reporting Checklist</a>?</p> | <p>Yes</p> |

1 **Single-cell transcriptome analysis illuminating the characteristics of species-**  
2 **specific innate immune responses against viral infections**

3

4 Hirofumi Aso<sup>1,2,3</sup>, Jumpei Ito<sup>1</sup>, Haruka Ozaki<sup>4,5</sup>, Yukie Kashima<sup>6</sup>, Yutaka Suzuki<sup>6</sup>,  
5 Yoshio Koyanagi<sup>2,3</sup>, and Kei Sato<sup>1,7,8,9,10,11,12,13,14\*</sup>

6

7 1. Division of Systems Virology, Department of Microbiology and Immunology, The  
8 Institute of Medical Science, The University of Tokyo, Tokyo 1088639, Japan

9 2. Institute for Life and Medical Sciences, Kyoto University, Kyoto 6068507, Japan

10 3. Graduate School of Pharmaceutical Sciences, Kyoto University, Kyoto 6068501,  
11 Japan

12 4. Bioinformatics Laboratory, Faculty of Medicine, University of Tsukuba, Tsukuba  
13 3050821, Japan

14 5. Center for Artificial Intelligence Research, University of Tsukuba, Tsukuba  
15 3058577, Japan

16 6. Laboratory of Systems Genomics, Graduate School of Frontier Sciences, The  
17 University of Tokyo, Kashiwa 2778561, Japan

18 7. International Research Center for Infectious Diseases, The Institute of Medical  
19 Science, The University of Tokyo, Tokyo 1088639, Japan

20 8. International Vaccine Design Center, The Institute of Medical Science, The  
21 University of Tokyo, Tokyo 1088639, Japan

22 9. Graduate School of Medicine, The University of Tokyo, Tokyo 1130033, Japan

23 10. Graduate School of Frontier Sciences, The University of Tokyo, Kashiwa  
24 2778561, Japan

25 11. Collaboration Unit for Infection, Joint Research Center for Human Retrovirus  
26 infection, Kumamoto University, Kumamoto, Japan

27 12. CREST, Japan Science and Technology Agency, Kawaguchi 3320012, Japan

28 13. Twitter: @SystemsVirology

29 14. Lead contact

30 \*Correspondence: keisato@g.ecc.u-tokyo.ac.jp

31

32 **Short title:** Comparison of innate immunity among mammals (43/50 characters)

33 **Keywords:** innate immunity; mammal; virus infection; single-cell RNA-sequencing;  
34 tensor

35 **Abstract** (150/250 words)

36

37 **Background**

38 Bats harbor various viruses without severe symptoms and act as their natural  
39 reservoirs. The tolerance of bats against viral infections is assumed to originate from  
40 the uniqueness of their immune system. However, how immune responses vary  
41 between primates and bats remains unclear. Here, we characterized differences in the  
42 immune responses by peripheral blood mononuclear cells to various pathogenic  
43 stimuli between primates (humans, chimpanzees, and macaques) and bats (Egyptian  
44 fruit bats) using single-cell RNA sequencing.

45

46 **Results**

47 We show that the induction patterns of key cytosolic DNA/RNA sensors and antiviral  
48 genes differed between primates and bats. A novel subset of monocytes induced by  
49 pathogenic stimuli specifically in bats was identified. Furthermore, bats robustly  
50 respond to DNA virus infection even though major DNA sensors are dampened in bats.

51

52 **Conclusions**

53 Overall, our data suggest that immune responses are substantially different between  
54 primates and bats, presumably underlying the difference in viral pathogenicity among  
55 the mammalian species tested.

## 56 **Introduction**

57 Although a virus can infect various animal species, the pathogenicity of the infection  
58 can differ among host species. For example, Old World monkeys, including rhesus  
59 macaques (*Macaca mulatta*), are naturally infected with Cercopithecine herpesvirus 1  
60 (also known as B virus) without any observable disorders, while humans (*Homo*  
61 *sapiens*) exhibit severe disorders after infection<sup>1</sup>. Bat species are naturally infected  
62 with a variety of viruses and behave as natural reservoirs of human pathogenic  
63 viruses<sup>2</sup>. For example, Marburg virus infection causes severe symptoms in humans  
64 but not in Egyptian fruit bats (*Rousettus aegyptiacus*), a putative natural host of this  
65 virus<sup>3</sup>. One possible factor that could define the differences in viral pathogenicity  
66 among host species is the difference in innate immune responses. For example, a  
67 previous study reported that Egyptian fruit bats lack the induction of proinflammatory  
68 cytokines, including *CCL8*, *FAS*, and *IL6*, which are related to disease severity in  
69 humans, upon Marburg virus infection, suggesting that the lack of cytokine induction  
70 is one of the reasons why Egyptian fruit bats exhibit asymptomatic infection with  
71 Marburg virus<sup>4</sup>.

72 Pathogen sensing is the initial step in triggering innate immune signaling. In a  
73 broad range of animals, including vertebrates, pathogen-associated molecular  
74 patterns (PAMPs) are recognized by pattern recognition receptors (PRRs) to induce  
75 subsequent immune responses<sup>5-8</sup>. In humans and mice (*Mus musculus*), double-  
76 stranded RNAs (dsRNAs), a PAMP for RNA viruses, are recognized by RNA sensors,  
77 such as RIG-I, MDA5, LGP2, TLR3, and TLR7/8<sup>5,6</sup>. Cytosolic DNAs, a PAMP for DNA  
78 viruses, are recognized by DNA sensors, such as cGAS, AIM2, IFI16, and TLR9<sup>5,6,9</sup>.  
79 Lipopolysaccharide (LPS), a PAMP for bacteria, is recognized by TLR4<sup>5,6,10</sup>. Once  
80 PAMPs are recognized by PRRs, type I interferons (IFNs) are produced, leading to  
81 the induction of IFN-stimulated genes (ISGs), which include many antiviral genes<sup>5,6</sup>.

82 In contrast to the similarities in the immune system between humans and mice,  
83 the immune system of bats is assumed to be quite different from that of humans in  
84 various aspects<sup>11-13</sup>. Genome analysis of Egyptian fruit bats showed expansion and  
85 diversification of immune-related genes, including type I IFN genes<sup>14</sup>. Transcriptome  
86 analysis showed that type I IFNs in the Australian black flying fox (*Pteropus alecto*)  
87 are constitutively expressed in unstimulated tissues, leading to the constitutive  
88 expression of ISGs<sup>15</sup>. These observations suggest that immunity in bats may be  
89 stronger than that in other mammals. In contrast, some studies have proposed that

90 immune responses in bats are dampened, resulting in bats exhibiting stronger  
91 tolerance to various viruses<sup>12,14,16</sup>. In particular, it is known that critical molecules  
92 involved in viral DNA sensing, such as cGAS, AIM2, and IFI16, are dampened or  
93 genetically lost in some bat species, including Egyptian fruit bats<sup>16,17</sup>. These  
94 differences in innate immunity between humans and bats could be one of the reasons  
95 why viral pathogenicity differs between these two mammals.

96 Previous works have highlighted the uniqueness of the bat immune system  
97 using genomic analysis<sup>14,15,17</sup>, transcriptome analysis<sup>4,18-20</sup>, and molecular biological  
98 experiments that reconstituted a part of the bat immune system in cell culture  
99 systems<sup>16,21,22</sup>. However, it remains unclear how and to what extent the innate immune  
100 response to pathogenic stimuli varies among mammals. Particularly, it is unclear how  
101 different innate immune responses are elicited by viral infections in different cell types  
102 in each mammal. Here, we used peripheral blood mononuclear cells (PBMCs) from  
103 four mammalian species and three pathogenic stimuli and conducted single-cell RNA  
104 sequencing (scRNA-seq) analysis to elucidate the differences in innate immune  
105 responses against pathogenic stimuli.

106

## 107 **Results**

108

### 109 **Experimental design**

110 To illuminate the differences in immune responses to infectious pathogens among  
111 mammalian species, we isolated PBMCs from four mammals including humans (*Homo*  
112 *sapiens*, Hs), chimpanzees (*Pan troglodytes*, Pt), rhesus macaques (*Macaca mulatta*,  
113 Mm), and Egyptian fruit bats (*Rousettus aegyptiacus*, Ra) (**Fig. 1A**). These PBMCs  
114 were inoculated with herpes simplex virus type 1 (HSV-1; a DNA virus), Sendai virus  
115 (SeV; an RNA virus), or lipopolysaccharide (LPS; a proxy for bacterial infection). We  
116 verified that these PBMCs could be infected with and/or respond to these viruses and  
117 LPS stimulation by quantifying viral RNAs and the upregulation of proinflammatory  
118 cytokines (e.g., IL1B and IL6), ISGs (e.g., EIF2AK2 and DDX58) and IFNB1 (**Fig.**  
119 **S1A–C**).

120 To analyze immune responses to stimuli at single-cell resolution, we performed  
121 scRNA-seq analysis of 16 types of PBMC samples: four mammalian species (Hs, Pt,  
122 Mm, and Ra) versus four conditions (mock infection/stimulation, HSV-1 infection, SeV  
123 infection, and LPS stimulation) using the 10x Genomics Chromium platform. After

124 filtering low-quality cells, a total of 40,717 cells from the 16 samples were used in the  
125 following analysis.

126

### 127 **The cellular composition of PBMCs from primates and bats**

128 We characterized the cellular composition of PBMCs from each mammalian species  
129 by annotating the cell type of individual single cells. To establish a common  
130 classification system for the cells from the different mammalian species, we first  
131 identified cell types present in multiple species (**Fig. 1B and 1C**). As cell types  
132 detected in multiple species, naïve B cells, non-naïve B cells (including memory B cells  
133 and intermediate B cells), naïve CD4+ T cells, non-naïve CD4+ T cells (including  
134 central memory CD4+ T cells, effector memory CD4+ T cells, proliferating CD4+ T  
135 cells, and regulatory T cells), naïve CD8+ T cells, non-naïve CD8+ T cells (including  
136 central memory CD8+ T cells, effector memory CD8+ T cells, and proliferating CD8+  
137 T cells), natural killer (NK) cells, mucosal-associated invariant T cells (MAITs),  
138 monocytes (Monos), conventional dendritic cells (cDCs), and plasmacytoid DCs  
139 (pDCs) were identified (**Fig. 1C**). Known marker genes for each cell type in humans  
140 were detected in the corresponding cell type in the unstimulated samples from the  
141 other animal species (**Fig. S2G**). Although most cell types were detected in all four  
142 species investigated, naïve CD8+ T cells and MAITs were undetectable in bat PBMCs,  
143 presumably because the cell numbers of these populations were relatively low in bats  
144 and/or the transcriptomic signatures of naïve CD4+ T cells and non-naïve CD8+ T  
145 cells were too similar in bats (hereafter we simply referred to Egyptian fruit bats as  
146 “bats”) (**Fig. 1C**). This result was consistent with a previous study, in which clear  
147 clusters of naïve CD8+ T cells and MAITs were not detected<sup>23</sup>. To establish a cellular  
148 classification system for the comparative transcriptome analysis, we defined six  
149 species-common cell types, namely, B cells, naïve T cells, killer TNK cells, Monos,  
150 cDCs, and pDCs, according to similarities in expression patterns (**Fig. S2H**).

151 The composition of the six cell types exhibited different changes upon exposure  
152 to the stimuli in the different species (**Fig. 1D**). The frequency of monocytes decreased  
153 after stimulation in all four species, whereas the frequency of B cells changed  
154 differently among the animal species and stimuli. After SeV infection, the frequency of  
155 B cells was decreased in all four species. On the other hand, after HSV-1 infection,  
156 the frequency of B cells was decreased in only humans.

157

## 158 **The differences in the immune response are large among animal species**

159 To describe the differences in immune responses to various stimuli in specific cell  
160 types among animal species, we first calculated the average expression levels of  
161 appropriate genes in each condition (4 animal species  $\times$  4 stimuli  $\times$  6 cell types = 96  
162 conditions). Using this “pseudobulk” transcriptome dataset, we first investigated which  
163 axis (i.e., animal species, stimulus, and cell type) was the most impactful element in  
164 shaping the expression patterns of immune cells. Thereby, we calculated the fold-  
165 change (FC) values of gene expression levels between unstimulated and  
166 corresponding stimulated conditions and performed principal component analysis  
167 (PCA) on the FC values. Subsequently, hierarchical clustering analysis was performed  
168 according to principal components (PCs) 1-30. The transcriptome data were first  
169 branched according to the animal species and then branched according to the cell  
170 type followed by the stimulus (**Fig. 1E**). This suggested that the difference in host  
171 species was the more impactful element in shaping the immune system, having a  
172 greater impact than the type of stimulus and cell type. In particular, our dataset showed  
173 that bat PBMCs exhibited different transcriptomic patterns irrespective of the type of  
174 stimulus and cell type compared to the PBMCs from the other three species used. Our  
175 results suggest that bats respond to pathogens in a different manner than primates.

176

## 177 **Extraction of species-specific immune responses**

178 We next characterized the differences in the immune responses to pathogenic stimuli  
179 among animal species. The FC values of our pseudobulk transcriptome dataset were  
180 represented by a four-mode tensor (4 animal species  $\times$  3 stimuli  $\times$  6 cell types  $\times$  7557  
181 orthologous genes). To characterize this extraordinary high-dimensionality  
182 transcriptome dataset, we utilized Tucker decomposition, a method of tensor  
183 decomposition (**Fig. 2A**). In this analysis, we excluded cDC and pDC data due to many  
184 missing values. Tucker decomposition generated a core tensor and four-factor  
185 matrices (A1–A4) related to the four axes (animal species, stimulus, cell type, and  
186 gene). For example, the factor matrix A1 (for host species) included three latent factors  
187 (L1\_1, L1\_2, and L1\_3), which could be regarded to represent common, bat-specific,  
188 and macaque-specific expression patterns, respectively (**Fig. 2B**).

189 To characterize species-specific immune responses, we developed a gene  
190 classification system according to the pattern of the species-associated latent factor  
191 in the tensor decomposition framework. First, we calculated the product of a core



192 tensor and the three-factor matrices A2 (for stimulus), A3 (for cell type), and A4 (for  
193 gene) (**Fig. 2C and Fig. S3A–B**). Consequently, we obtained three cubic datasets  
194 with three axes, stimulus, cell type, and gene. These cubic data were related to L1\_1  
195 (for the common factor), L1\_2 (for the bat-specific factor), or L1\_3 (for the macaque-  
196 specific factor). Subsequently, we classified the genes into 10 categories according to  
197 their expression patterns in each cubic dataset (the results for the bat-specific (L1\_2)  
198 and other factors (L1\_1 and L1\_3) are shown in **Fig. 2D, Fig. S3G, and Fig. S3I**,  
199 respectively). In the factor matrix A2 (for stimulus), the values for the latent factors  
200 related to HSV-1 and SeV were similar (**Fig. S3A**). Therefore, these two categories  
201 were integrated into the category “Virus” in the gene classification. Additionally, two  
202 cell type categories, NaiveT and KillerTNK, were integrated into the category “TNK”  
203 (**Fig. S3B**). The pattern for raw FC values supported that the gene classification by  
204 the tensor decomposition framework succeeded in extracting the characteristic  
205 patterns of gene expression alterations upon pathogenic stimuli (**Fig. S3J–L**).

206

### 207 **Differential dynamics of pathogen sensing and immune responses**

208 To highlight the uniqueness of immunity in bats compared to that in primates, we  
209 focused on the expression pattern represented by the bat-specific factor (L1\_2) and  
210 performed Gene Ontology (GO) analysis on the 10 gene categories (**Fig. 2E**). In the  
211 gene category “ALL\_high”, which included genes upregulated particularly in bats  
212 regardless of the stimulus and cell type, GO terms related to innate immune responses,  
213 such as IFN signaling, DDX58/IFIH1-mediated induction of IFN, RIG-I like receptors  
214 (RLRs) signaling pathways, and the antiviral mechanism by ISGs, were enriched.

215 To dissect the “ALL\_high” genes in the bat-specific factor, we further extracted  
216 the genes that belonged not only to the “ALL\_high” category in the bat-specific factor  
217 but also to that in the common factor (L1\_1). This fraction represented genes that were  
218 upregulated by stimuli in all species but whose induction levels were highest in bats.  
219 These genes included various PPRs, such as RIG-I-like receptors (RLRs) (RIG-I,  
220 LGP2, and MDA5) and cGAS, a DNA sensor, suggesting that these genes were  
221 upregulated to higher levels in bats than in the other species across the cell types and  
222 stimuli (**Fig. 2F**). These higher FC values in bats could be explained by two possibilities.  
223 First, the expression levels of these genes after stimulation were higher in bats than  
224 in primates. Second, the basal expression levels of these genes in bats were lower  
225 than those in primates. Therefore, we calculated the relative expression levels of these

226 genes in bats compared to humans and showed that the basal expression levels of  
227 these genes were lower in bats than in humans (**Fig. 2G**). These results suggest that  
228 the induction dynamics of these PRRs in bats are likely different from those in primates,  
229 possibly leading to the differences in the induction of immune responses.

230

### 231 **Robust immune responses to a DNA virus in bats**

232 As critical DNA sensors, such as cGAS, AIM2, IFI16, and TLR9, are dampened or  
233 genetically lost in bat species<sup>16,17,24</sup>, it has been hypothesized that bats, including  
234 Egyptian fruit bats, cannot efficiently activate innate immune responses against DNA  
235 viruses. To test this hypothesis, we analyzed the IFN response upon HSV-1 (a DNA  
236 virus) infection by analyzing the induced levels of “core<sup>mamm</sup> ISGs”, a set of genes that  
237 are commonly induced by type I IFNs across mammals that were defined in a previous  
238 study<sup>25</sup>. Intriguingly, we found that the core<sup>mamm</sup> ISGs were upregulated upon HSV-1  
239 infection in most cell types in bats (**Fig. 3A**). The induced levels were comparable to  
240 those induced by SeV (an RNA virus) infection and higher than those induced by LPS  
241 stimulation. Furthermore, the induced levels in bats were comparable to those in  
242 primates. This suggests that immune cells in bats can sense and respond to HSV-1  
243 infection even though critical DNA sensors are dampened.

244 To address the possibility that pathogen sensors other than DNA sensors  
245 contribute to the sensing of HSV-1 infection in bats, we examined the expression  
246 levels of various PRRs (**Fig. 3B**). The expression of some PRRs, including TLR3, a  
247 dsRNA sensor associated with HSV-1 sensing in humans and mice<sup>26</sup>, was detected  
248 not only in primates but also in bats, suggesting the possibility that these PRRs  
249 compensate in the response to HSV-1 infection in bats (see **Discussion**).

250

251

### 252 **Identification of bat-specific subsets of monocytes**

253 Next, we investigated cellular subsets within the cell types that are characteristic in  
254 bats to explain the differences in immune responses among the species. We  
255 particularly searched for cellular subsets that specifically appeared after pathogenic  
256 stimulus exposure in each species according to the dimensionality reduction analysis  
257 of transcriptome data. In humans, chimpanzees, and macaques, no subset appeared  
258 in any cell type after stimulation (**Fig. S4A**). Similarly, such subsets were not identified  
259 in T/NK or B cells in bats. In contrast, we found that two subsets of bat monocytes

260 (referred to as Clusters 5 and 7) specifically appeared after stimulation (**Fig. 4A**). To  
261 validate whether these subsets (Clusters 5 and 7) are unique in bats, we identified  
262 marker genes for these clusters and subsequently examined whether the marker  
263 genes were expressed in monocytes from the other animal species. The marker genes  
264 for Cluster 5 (referred to as C5 markers) were not highly expressed in any cluster of  
265 monocytes from primates (**Fig. 4B**). Furthermore, high expression levels of C5  
266 markers in bat monocytes were found only after stimulation. This suggested that  
267 Cluster 5 was not only bat-specific but also specifically induced by pathogenic stimuli.  
268 Unlike the C5 markers, the marker genes for Cluster 7 (C7 markers) were highly  
269 expressed not only in bat Cluster 7 but also in some monocytes in primates (**Fig. 4C**).  
270 Although cells with higher expression of C7 markers were induced upon stimulation in  
271 both bats and primates, these cells in primates did not form a separate cluster similar  
272 to Cluster 7 in bats (**Fig. S4B**). Furthermore, the proportions of Clusters 5 and 7  
273 differed depending on the stimulus: HSV-1-infected and LPS-stimulated samples  
274 showed the highest frequencies of Clusters 5 and 7, respectively (**Fig. 4D**).

275 To characterize these two clusters, we identified differentially expressed genes  
276 (DEGs) in Clusters 5 and 7 compared to the other clusters of bat monocytes.  
277 According to GO analysis, Cluster 5 was characterized by lower expression of ISGs  
278 (**Fig. 4E, 4F**). Additionally, Cluster 5 highly expressed known suppressors of the  
279 inflammatory response, such as DUSP1, DUSP5, and SOCS2<sup>27-29</sup>. On the other hand,  
280 Cluster 7 could be characterized by a higher expression of various cytokines related  
281 to chemotaxis (**Fig. 4G**), including CXCL6, IL18BP, CXCL8, CCL2, CCL8, CCL13,  
282 CCL5, CXCL10, IL15, and IL4I1 ([https://www.gsea-  
283 msigdb.org/gsea/msigdb/human/geneset/GOBP\\_CELL\\_CHEMOTAXIS.html](https://www.gsea-msigdb.org/gsea/msigdb/human/geneset/GOBP_CELL_CHEMOTAXIS.html)) (**Fig.**  
284 **4G, 4H**). Overall, we established that there are two unique subsets of bat monocytes  
285 with different characteristics (see **Discussion**).

## 286 Discussion

287 Differences in viral pathogenicity among host species are thought to be attributed to  
288 differences in immune responses against viral infections among the species<sup>30</sup>.  
289 However, it remains unclear how immune responses, particularly innate immunity  
290 against viral infections, differ among host species. In the present study, we performed  
291 scRNA-seq on 16 types of PBMC samples, derived from a combination of four host  
292 species and four infection conditions (**Fig. 1A**), and showed that the differences in the  
293 immune responses among the host species were more impactful than those among  
294 both the stimuli and the cell types (**Fig. 1E**). In particular, the transcriptomic changes  
295 after pathogenic stimulation in bats differed from those in primates. Furthermore, we  
296 established a bioinformatic pipeline to characterize species-specific immune  
297 responses from transcriptome profiles with extraordinarily high dimensions (4 animal  
298 species × 3 stimuli × 4 cell types × 7,557 orthologous genes) (**Fig. 2A**). Our study  
299 provides fundamental data to identify differences in innate immune systems among  
300 mammalian species that partly explain the differences in viral pathogenicity among  
301 host species.

302 It is known that two DNA sensing pathways mediated by STING<sup>16</sup> and PYHIN  
303 proteins, including AIM2 and IFI16<sup>17</sup>, are dampened in bats, including Egyptian fruit  
304 bats. In addition, a previous study using a cell line derived from big brown bats  
305 (*Eptesicus fuscus*) suggested that the TLR9-mediated DNA sensing pathway is also  
306 weakened in bats<sup>24</sup>. Based on these observations, it was hypothesized that the ability  
307 to sense DNA virus infection is weakened in bats<sup>12,13</sup>. However, we showed that bat  
308 PBMCs robustly induced IFN responses upon infection with the DNA virus HSV-1 (**Fig.**  
309 **3A**). This suggests that bats can initiate an innate immune response after infection  
310 with DNA viruses (at least HSV-1) and that bats have another pathway to sense DNA  
311 viruses. An alternative possibility is that the IFN response in response to HSV-1  
312 infection was triggered by sensing viral molecules other than DNAs: it is known that,  
313 in humans and mice, dsRNA sensing by TLR3 plays an important role in responding  
314 to HSV-1 infection<sup>26,31</sup>. Furthermore, the Egyptian fruit bat genome encodes an intact  
315 TLR3 gene (NCBI Gene ID: 107510436), and bat immune cells express TLR3 (**Fig.**  
316 **3B**). These data suggest that in bats, bat TLR3 may compensate for the immune  
317 responses induced by DNA sensors, leading to IFN responses to HSV-1 infection.

318 To characterize the bat-specific innate immune responses based on ultrahigh-  
319 dimensionality transcriptome data (4 animal species × 4 stimuli × 6 cell types × 7,557

320 orthologous genes), we established an analytical framework utilizing tensor  
321 deconvolution (**Fig. 2A**). This framework could i) extract a species-specific effect on  
322 gene expression changes, ii) compare the effects among the cell types and the stimuli,  
323 and iii) classify genes according to the differential pattern of a species-specific effect  
324 among the cell types and the stimuli. Using this framework, we found that the  
325 expression levels of key DNA and RNA sensors, including cGAS, RIG-I, MDA5, and  
326 LGP2, were highly induced in bats compared with primates, regardless of the cell type  
327 or stimulus (**Fig. 2F**). Furthermore, the basal expression levels of these PRRs in bats  
328 were lower than those in humans (**Fig. 2G**). On the other hand, after stimulation, the  
329 expression levels of these PRRs in bats were comparable to those in humans. These  
330 results suggest that the induction dynamics of these PRRs in bats are likely different  
331 from those in primates, leading to the differences in the induction of immune responses.  
332 Indeed, several antiviral ISGs, such as IFI6 and IFIT3, exhibited expression dynamics  
333 similar to those of these PRRs (**Fig. 2F, 2G**). These differences could be one of the  
334 reasons why immune responses differ between bats and primates.

335 Another factor that can explain the differences in immune responses among  
336 host species is the presence of species-specific cellular subsets. In bat monocytes,  
337 we identified two subsets that were specifically induced by stimuli (i.e., Clusters 5 and  
338 7) (**Fig. 4A**). Cluster 5 was a bat-specific subset induced preferentially by HSV-1  
339 infection (**Fig. 4B, 4D**). Interestingly, even though Cluster 5 was induced after  
340 stimulation, Cluster 5 exhibited lower expression of ISGs and higher expression of  
341 immunosuppressive genes (DUSP1, DUSP5, and SOCS2)<sup>27-29</sup> (**Fig. 4E, 4F**). This  
342 observation suggests that the immune responses in Cluster 5 are downregulated  
343 presumably by negative feedback signaling and that Cluster 5 may contribute to  
344 controlling excessive immune activation in bats. On the other hand, Cluster 7 was  
345 identified as a monocyte subset that was mainly induced by LPS stimulation (**Fig. 4C,**  
346 **4D**). Cluster 7 highly expressed several proinflammatory cytokines and chemokines  
347 (CXCL6, IL18BP, CXCL8, CCL2, CCL8, CCL13, CCL5, CXCL10, IL15, and IL4I1) (**Fig.**  
348 **4G, 4H**). Cluster 7 may contribute to the recruitment of leukocytes since these  
349 cytokines are associated with the chemotaxis of neutrophils (CCL8, CXCL6, and  
350 CXCL8), basophils (CXCL8, CCL2, CCL5, CCL8, and CCL13), eosinophils (CCL5,  
351 CCL8, and CCL13), monocytes (CCL5, CCL8, and CCL13), T cells (CCL5, CCL8,  
352 CCL13, CXCL8, and CXCL10), and NK cells (CCL5 and CCL8) in humans and mice<sup>32</sup>  
353 ([https://docs.abcam.com/pdf/immunology/chemokines\\_poster.pdf](https://docs.abcam.com/pdf/immunology/chemokines_poster.pdf)). Based on the

354 expression pattern of the marker genes for Cluster 7 (**Fig. 4C, S4B**), cellular subsets  
355 corresponding to Cluster 7 were also present in primate monocytes. However, these  
356 primate cells did not form a separate cluster in the dimensionality reduction analysis  
357 based on the transcriptome profile (**Fig. 4A**). These results suggest that the monocyte  
358 subset represented by Cluster 7 exhibits unique gene expression and thus may exert  
359 unique functions in bats. Although the specific functions of these monocyte subsets  
360 (Clusters 5 and 7) in immune responses in bats are still unclear, these unique subsets  
361 may contribute to bat-specific host immune responses.

362

363

### 364 **Limitations of the study**

365 In the present study, we elucidated differences in innate immune responses among  
366 host species from various aspects. However, we did not address differences in the  
367 outcomes of the innate immune responses, such as differences in viral pathogenicity.  
368 Another limitation is that the bioinformatic resources we used, such as gene annotation,  
369 gene ontology, and cellular annotation, have been developed in a human-centric way.  
370 Therefore, there is the possibility that immune responses induced by species-specific  
371 genes and cell types were overlooked. Despite these limitations, we present valuable  
372 resources to illuminate differences in immune responses among host species,  
373 including Egyptian fruit bats, and clues to elucidate differences in viral pathogenicity  
374 among species. Further study to elucidate the functional consequences of these  
375 differences is needed to reveal the mechanisms by which bats can tolerate infections  
376 with various viruses.

377

378 **Acknowledgements**

379 We would like to thank Naoko Misawa, Akiko Oide, Mai Suganami, and Kazumi Abe  
380 (The University of Tokyo), for technical support, Hiroo Imai (Kyoto University) for  
381 providing primate PBMCs, Ayuko Morita (Kyoto City Institute of Health and  
382 Environmental Sciences) for providing bat PBMCs, Yasushi Kawaguchi (The  
383 University of Tokyo) for providing HSV-1, Takashi Irie (Hiroshima University) for  
384 providing SeV, and Human Genome Center (the Institute of Medical Science, the  
385 University of Tokyo) for providing the super-computing resource SHIROKANE  
386 (<http://sc.hgc.jp/shirokane.html>). This work was supported by the Cooperative  
387 Research Program of the Primate Research Institute, Kyoto University (2019-c9).

388

389

390 **Funding**

391 This study was supported in part by AMED SCARDA Japan Initiative for World-leading  
392 Vaccine Research and Development Centers "UTOPIA" (JP223fa627001, to K.S.),  
393 AMED SCARDA Program on R&D of new generation vaccine including new modality  
394 application (JP223fa727002, to K.S.); AMED Research Program on Emerging and Re-  
395 emerging Infectious Diseases (JP22fk0108146, to Y.Kashima and K.S.;  
396 JP21fk0108494 to K.S.; 21fk0108425, to K.S.; 21fk0108432, to K.S.); AMED  
397 Research Program on HIV/AIDS (JP22fk0410039, to K.S.); JST PRESTO  
398 (JPMJPR22R1, to J.I.); AMED Moonshot Research and Development Program  
399 (JP21zf0127005, to H.O.); JST CREST (JPMJCR20H4, to K.S.); JSPS KAKENHI  
400 Grant-in-Aid for Early-Career Scientists (20K15767, to J.I.; 19K20394, to H.O.); JSPS  
401 Core-to-Core Program (A. Advanced Research Networks) (JPJSCCA20190008, to  
402 K.S.); JSPS Research Fellow DC1 (20J23299, to H.A.).

403

404

405 **Author Contributions**

406 H.A. mainly performed bioinformatics analysis. J.I. and H.O. supervised the  
407 bioinformatics analysis. Y.Kashima mainly performed the experiments. Y.S.,  
408 Y.Koyanagi, and K.S. supervised the experiments. K.S. and Y.Koyanagi provided  
409 reagents. K.S. conceived and designed the experiments. H.A. and J.I. wrote the initial  
410 manuscript. All authors reviewed and edited the manuscript.

411

412 **Declaration of Interests**

413 The authors declare no competing interests.

414

415 **Abbreviations**

416 cDCs: conventional dendritic cells; CIU: cell infectious unit; CP10k: counts per 10,000  
417 counts in the cell; DEGs: differentially expressed genes; DMEM: Dulbecco's modified

418 Eagle's medium; dsRNAs: double-stranded RNAs; FC: fold-change; FCS fetal calf  
419 serum; FDR: false discovery rate; GEMs: gel beads-in-emulsion; GSVA gene set  
420 variation analysis; GO: Gene Ontology; HOI: higher-order orthogonal iteration; Hs:  
421 *Homo sapiens*; HSV-1: herpes simplex virus type 1; IFNs: interferons; ISGs: IFN-  
422 stimulated genes; LPS: Lipopolysaccharide; mad: median absolute deviation; MAITs:  
423 mucosal-associated invariant T cells; Mm: *Macaca mulatta*; Monos: monocytes; NK:  
424 natural killer; PAMPs: pathogen-associated molecular patterns; PBMCs: peripheral  
425 blood mononuclear cells; PCs: principal components; PCA: principal component  
426 analysis; pDCs: plasmacytoid dendritic cells; PFU plaque forming unit; PRRs: pattern  
427 recognition receptors; Pt: *Pan troglodytes*; Ra: *Rousettus aegyptiacus*; RLRs: RIG-I-  
428 like receptors; scRNA-seq: single-cell RNA sequencing; SeV: Sendai virus; TD:  
429 Tucker decomposition; UMAP: uniform manifold approximation and projection; UMI:  
430 unique molecular identifier; QC: quality control  
431



432 **Figure legends**

433

434 **Figure 1. scRNA-seq analysis of PBMCs from four animal species inoculated**  
435 **with pathogenic stimuli**

436 (A) Schematic of the experimental design. See also **Fig. S1**.

437 (B) Uniform manifold approximation and projection (UMAP) plots representing the  
438 gene expression patterns of the cells from the four species. Each dot is colored  
439 according to the cell type. Gray dots indicate cells unassigned into any cell type. See  
440 also **Fig. S2**.

441 (C) Comparison of identified cell types among the species. Dot: detected, question  
442 mark: undetected. The definitions of six species-common cell types are shown on the  
443 right side. See also **Fig. S2H**.

444 (D) The cellular compositions of PBMC samples. The compositions according to the  
445 six common cell types are shown.

446 (E) Hierarchical clustering analysis of 48 pseudobulk datapoints (4 animal species x 3  
447 stimuli x 4 cell types = 48 conditions) based on PC1-30 calculated from the fold-change  
448 values (respective stimulus versus unstimulated) for gene expression.

449

450 **Figure 2. Characterization of species-specific immune responses using a tensor**  
451 **decomposition framework**

452 (A) Tensor decomposition of the fold-change values for pseudobulk transcriptome data.

453 (B) Heatmap representing a latent factor matrix relating to species. Columns indicate  
454 the animal species, and rows indicate the latent factors representing species-common  
455 (L1\_1), bat-specific (L1\_2), and macaque-specific (L1\_3) factors. See also **Fig. S3A–**

456 **B**.

457 (C) Classification of genes according to the differential patterns of the latent factors  
458 related to species. For each of the species-common (L1\_1), bat-specific (L1\_2), and  
459 macaque-specific (L1\_3) factors, the product of the core tensor and three latent factor  
460 matrices related to stimulus, cell type, and gene was calculated (left), and the genes  
461 were classified into 11 categories according to the binary patterns for each calculated  
462 product (right). See also **Fig. S3C–F**.

463 (D) Heatmap representing the values of the products calculated in **Figure 2C**. From  
464 the three products, the data related to the bat-specific factor (L1\_2) are shown. Each

465 row indicates the respective gene. The color keys shown on the right of the heatmap  
466 indicate gene categories. See also **Fig. S3G–L**.

467 (E) GO terms enriched in each gene category relating to the bat-specific factor. GO  
468 terms with a false discovery rate (FDR)  $\leq 0.1$  and an odds ratio  $\geq 1$  are shown.

469 (F) Heatmap representing the induction levels of ALL\_high genes for the bat-specific  
470 factor. Additional classification according to the gene classification of the species-  
471 common factors is shown to the right of the heatmap. Genes categorized as ALL\_high  
472 in both the species-common factor and the bat-specific factor are shown on the right  
473 side. The colored circle indicates the functional category of the gene.

474 (G) Heatmap representing the relative expression levels (bats versus humans) of the  
475 genes shown in **Figure 2F**.

476

### 477 **Figure 3. Robust immune responses to a DNA virus in bats**

478 (A) Boxplot of the expression levels of core<sup>mamm</sup> ISGs in every single cell. The Y-axis  
479 indicates the global expression level (GSVA score) of the core<sup>mamm</sup> ISGs.

480 (B) Heatmap representing the mean expression levels of sensor genes. The mean  
481 values were calculated without using the information for the stimulus.

482

### 483 **Figure 4. Identification of bat-specific subsets of monocytes**

484 (A) UMAP plots representing the gene expression patterns of monocytes from the four  
485 species. The dots are colored according to the cell cluster defined for each animal  
486 species. See also **Fig. S4A**.

487 (B, C) UMAP plots representing the average expression levels of marker genes for  
488 Cluster 5 [C5markers] (B) and Cluster 7 [C7markers] (C). See also **Fig. S4B**.

489 (D) The cellular composition of bat monocytes. The composition is shown according  
490 to the cluster. The black frame indicates Clusters 5 and 7 in stimulated samples.

491 (E) Heatmap representing the mean expression levels of differentially expressed  
492 genes (DEGs) in Cluster 5 of bat monocytes.

493 (F) Summary of the GO terms enriched in DEGs in Cluster 5. GO terms enriched in  
494 up- and downregulated genes are shown in red and blue, respectively.

495 (G) Heatmap representing the mean expression levels of differentially expressed  
496 genes (DEGs) in Cluster 7 of bat monocytes.

497 (H) Summary of the GO terms enriched in DEGs in Cluster 7. GO terms enriched in  
498 up- and downregulated genes are shown in red and blue, respectively.

499 **Data and code availability**

500 Single-cell RNA-seq data have been deposited in the GEO database (GSE218199)  
501 and are publicly available. Original data to describe figures in this paper have been  
502 deposited at Mendeley (DOI: 10.17632/kg3dfkyjv5.1) and are publicly available. All  
503 original code has been deposited at GitHub ([https://github.com/TheSatoLab/scRNA-](https://github.com/TheSatoLab/scRNA-seq_PBMC_Animals_Aso_et_al)  
504 [seq\\_PBMC\\_Animals\\_Aso\\_et\\_al](https://github.com/TheSatoLab/scRNA-seq_PBMC_Animals_Aso_et_al)) and is publicly available.

505  
506

507 **Ethics Statement**

508 All protocols involving specimens from animals were performed in accordance with the  
509 Science Council of Japan's Guidelines for the Proper Conduct of Animal Experiments.  
510 The protocols were approved by the Institutional Animal Care and Use Committee of  
511 Kyoto University (approval IDs: 2017-B-5, 2019-C-9, 2019-162, 2019-177, and 2020-  
512 C-5). All protocols involving specimens from humans recruited at Kyoto University  
513 were reviewed and approved by the Institutional Review Boards of Kyoto University  
514 (approval ID: G1089). All human subjects provided written informed consent. All  
515 protocols for the use of human specimens were reviewed and approved by the  
516 Institutional Review Boards of The Institute of Medical Science, The University of  
517 Tokyo (approval ID: 2019-55) and Kyoto University (approval ID: G1089).

518

519 **Methods**

520 **Cells**

521 Vero cells (obtained from the Laboratory of Bernard Roizman, University of Chicago,  
522 USA)

523 LLC-MK2 cells (rhesus macaque kidney epithelial cells) (CCL-7, ATCC)

524

525 **PBMC collection**

526 Human peripheral blood was obtained from the arm vein. To obtain chimpanzee  
527 peripheral blood, a chimpanzee was anesthetized for a regular health examination.  
528 Anesthesia was induced with intramuscular administration of the combination of 0.012  
529 mg/kg medetomidine (Meiji Seika Pharma Co., Ltd. ), 0.12 mg/kg midazolam (Sand  
530 Co., Ltd. ), and 3.5 mg/kg ketamine (Fujita Pharm, Tokyo) and maintained with  
531 constant rate infusion (4-10 mg/kg/h) of propofol (1% Diprivan, Sand Co., Ltd. ).  
532 Peripheral blood was obtained from the femoral vein. To obtain rhesus macaque

533 peripheral blood, a rhesus macaque was anesthetized. Anesthesia was induced with  
534 intramuscular administration of 8 mg/kg ketamine followed by deep anesthetization  
535 using an intravenous injection of sodium pentobarbital (30 mg/kg) (Kyoritsu Seiyaku).  
536 Peripheral blood was obtained by cardiac puncture before exsanguination and  
537 perfusion. Bat peripheral blood was obtained from the cephalic vein in the patagium.  
538 PBMCs were isolated from peripheral blood by density gradient centrifugation using  
539 Ficoll-Paque™ Plus (Cytiva, Cat# 17144003).

540

#### 541 **HSV-1 preparation and titration**

542 HSV-1 (strain F; GenBank accession number: GU734771)<sup>33</sup> was prepared as  
543 previously described<sup>26</sup> and kindly provided by Dr. Yasushi Kawaguchi (The Institute of  
544 Medical Science, The University of Toyo, Japan). To titrate viral infectivity, prepared  
545 virus was diluted 10-fold in Medium 199 (Thermo Fisher Scientific, Cat# 11825015)  
546 containing 1% fetal calf serum (FCS) (Nichirei Biosciences, Cat# 175012), and Vero  
547 cells were infected with dilutions of the virus at 37 °C. At one hour postinfection, the  
548 culture medium was replaced with Medium 199 containing 160 µg/ml human γ-globulin  
549 (Sigma Aldrich, G4386-25G), and the cells were cultured at 37 °C for 2–3 days. To  
550 calculate the viral titer [plaque forming unit (PFU)], the number of plaques per well was  
551 counted.

552

#### 553 **SeV preparation and titration**

554 SeV (strain Cantrell, clone cCdi; GenBank accession number: AB855654) was  
555 prepared as previously described<sup>34</sup> and kindly provided by Dr. Takashi Irie (Hiroshima  
556 University, Japan). To titrate viral infectivity, prepared virus was diluted 10-fold in  
557 Dulbecco's modified Eagle's medium (DMEM) (Sigma–Aldrich, Cat# D6046-500ML)  
558 containing 10% FCS, and LLC-MK2 cells were infected with dilutions of the virus at  
559 37 °C. At one hour postinfection, the cells were washed with PBS and cultured with  
560 DMEM containing 10% FCS at 37 °C. At one day postinfection, the infected cells were  
561 fixed with acetone (Nacalai Tesque, Cat# 21914-03)/methanol (Nacalai Tesque, Cat#  
562 00310-95). To calculate the viral titer [cell infectious unit (CIU)], the fixed cells were  
563 stained with a rabbit anti-SeV polyclonal antibody<sup>35</sup> as the primary antibody and an Alexa  
564 488-conjugated goat anti-rabbit IgG antibody (Thermo Fisher Scientific, Cat# A-11008) as  
565 the secondary antibody, and the number of fluorescent foci per well was counted.

566

567 **Infection and stimulation**

568 One million PBMCs were maintained in 500 µl RPMI 1640 medium (Sigma–Aldrich,  
569 Cat# R8758-500ML) and infected with HSV-1 or SeV at a multiplicity of infection of  
570 0.1. To mimic microbial infection, LPS (Sigma–Aldrich, Cat# L5024-10MG) was added  
571 at a final concentration of 200 ng/ml. At one day post infection, infected/stimulated  
572 PBMCs were centrifuged, resuspended in PBS, and used for bulk RT–qPCR and  
573 scRNA-seq (see below).

574

575 **RT–qPCR**

576 RT–qPCR was performed as previously described<sup>36</sup>. Briefly, cellular RNA was  
577 extracted using the QIAamp RNA Blood Mini Kit (Qiagen, Cat# 52304) and then  
578 treated with an RNase-free DNase set (Qiagen, Cat# 79254). cDNA was synthesized  
579 using SuperScript III reverse transcriptase (Thermo Fisher Scientific, Cat# 18080044)  
580 and random primers (Thermo Fisher Scientific, Cat# 48190011). RT–qPCR was  
581 performed using Power SYBR Green PCR Master Mix (Thermo Fisher Scientific, Cat#  
582 4367659) and the primers listed in **Table S1**. For RT–qPCR, the CFX Connect Real-  
583 Time PCR Detection System (Bio-Rad) was used.

584

585 **Sequencing of scRNA-seq libraries**

586 scRNA-seq libraries were constructed using the Chromium Next GEM Single Cell 3'  
587 Kit according to the manufacturer's instructions (10x Genomics). Briefly, cells, gel  
588 beads, and oil were loaded onto the Chromium platform to generate single-cell gel  
589 beads-in-emulsion (GEMs). Barcoded cDNAs were pooled for amplification, and  
590 adaptors and indices for sequencing were added. The evaluation was conducted using  
591 a BioAnalyzer (Agilent Technologies). The libraries were sequenced with paired-end  
592 reads using the NovaSeq6000 platform (Illumina).

593

594 **Genome sequence dataset**

595 Genome sequences of the animal species including humans (GRCh38.p13, RefSeq  
596 accession: GCF\_000001405.39), chimpanzees (Clint\_PTRv2, RefSeq accession:  
597 GCF\_002880755.1), rhesus macaques (Mmul\_10, RefSeq accession:  
598 GCF\_003339765.1), and Egyptian fruit bats (mRouAeg1.p, RefSeq accession:  
599 GCF\_014176215.1) were obtained from NCBI RefSeq  
600 ([www.ncbi.nlm.nih.gov/genome](http://www.ncbi.nlm.nih.gov/genome)). From the genome sequences, ALT contig

601 sequences were excluded. The genome sequences of viruses including HSV-1 (strain:  
602 F, accession: GU734771.1) and SeV (strain: Cantell clone cCdi, accession:  
603 AB855654.1) were also obtained from NCBI RefSeq. A custom reference genome  
604 sequence for each animal species was generated by adding the genome sequences  
605 of HSV-1 and SeV to the genome sequence of the animal species.

606

### 607 **Gene annotation and ortholog information**

608 Gene annotations of humans (GRCh38.p13, Release 109.20200228), chimpanzees  
609 (Clint\_PTRv2, Release 105), rhesus macaques (Mmul\_10, Release 103), and  
610 Egyptian fruit bats (mRouAeg1.p, Release 101) were obtained from NCBI RefSeq.  
611 From the gene annotations, only the records for protein\_coding,  
612 transcribed\_pseudogene, lncRNA, pseudogene, antisense\_RNA,  
613 ncRNA\_pseudogene, V\_segment, V\_segment\_pseudogene, C\_region,  
614 C\_region\_pseudogene, J\_segment, J\_segment\_pseudogene, and D\_segment were  
615 extracted according to the CellRanger tutorial  
616 ([https://support.10xgenomics.com/single-cell-gene-  
617 expression/software/pipelines/latest/using/tutorial\\_mr](https://support.10xgenomics.com/single-cell-gene-expression/software/pipelines/latest/using/tutorial_mr)). In addition, to quantify viral  
618 RNA abundance, the records for viruses were added. The whole viral genome was  
619 treated as a single exon, and a total of four lines (the positive and negative strands of  
620 HSV-1 and SeV) were added.

621 A list of orthologous genes between humans and the other animal species  
622 (chimpanzees, rhesus macaques, and Egyptian fruit bats) was obtained from NCBI on  
623 July 26th, 2021 ([https://ftp.ncbi.nih.gov/gene/DATA/gene\\_orthologs.gz](https://ftp.ncbi.nih.gov/gene/DATA/gene_orthologs.gz)). From the file,  
624 the records for orthologs between humans (taxonomy ID: 9606) and chimpanzees  
625 (taxonomy ID: 9598), rhesus macaques (taxonomy ID: 9544), or Egyptian fruit bats  
626 (taxonomy ID: 9407) were extracted.

627 The ortholog list from NCBI lacked information on some critical immune-related  
628 genes of Egyptian fruit bats, such as CD4 and IRF1. Therefore, we retrieved  
629 information from the Bat1K gene annotation<sup>37</sup> (<https://bat1k.com>): First, we made a  
630 custom gene annotation for Egyptian fruit bats by adding information from the Bat1K  
631 gene annotation to the RefSeq gene annotation. Second, we extracted exons in the  
632 Bat1K gene annotation that overlapped with exons in the RefSeq gene annotation by  
633 using the bedtools intersect command with the wao option (v2.30.0)<sup>38</sup>. In this step, the  
634 exons in the Bat1K gene annotation that did not overlap with the exons in the RefSeq

635 gene annotation were also extracted and added to custom gene annotations as  
636 additional genes. Next, the exons that contained overlaps and had the same gene  
637 name (the same symbol or known to be an ortholog) were added to custom gene  
638 annotations as an alternative splicing variant of the gene. Then, the remaining  
639 overlapping exons were processed by determining which information (RefSeq or  
640 Bat1K) should be used preferentially. The criteria were as follows: i) genes whose  
641 symbols are not prefixed with “LOC” were given priority, ii) genes whose symbols are  
642 included in the human gene list were given priority, and iii) information from RefSeq  
643 was given priority otherwise. According to these criteria, the annotation with the higher  
644 priority (RefSeq or Bat1K) was selected and used in the custom gene annotation.

645 As a result of the integration of gene annotations, the number of orthologous  
646 genes in the custom gene annotation of bats increased from 16374 to 16903.  
647 Importantly, immune-related genes that were not defined in the RefSeq gene  
648 annotation, such as TLR1, IRF1, and CD4, were added to the custom gene annotation.

649 Considering the orthologous relationships, we prepared three types of gene  
650 sets for each animal species: i) “all genes”, including all genes in the animal species;  
651 ii) “genes shared with humans”, including genes with orthologs in humans; and iii)  
652 “common genes”, genes shared among the four analyzed animal species. Unless  
653 otherwise noted, “all genes” were used up to cell annotation, and “common genes”  
654 were used after cell annotation.

655

### 656 **Processing scRNA-seq data for generating count matrices**

657 Gene expression count matrices for scRNA-Seq data were generated using  
658 Cell Ranger (v6.0.1) (10x Genomics). First, we built a custom reference for each animal  
659 species from the custom reference genome sequence and custom gene annotation  
660 using the “cellranger mkref” command. Subsequently, we generated unique molecular  
661 identifier (UMI)-based count matrices from the raw scRNA-seq data and custom  
662 references using the “cellranger count” command with default settings.

663

### 664 **Quality control (QC) of scRNA-seq data**

665 First, we removed cells with abnormal genes per cell (genes/cell) and counts per cell  
666 (counts/cell) values using the Seurat package (v4.0.4)<sup>39</sup>: Cells with 800–5,000  
667 genes/cell or 1,200–25,000 counts/cell were extracted. Second, we removed  
668 nontargeted cells in the present study. We annotated the cell type of individual cells

669 using Azimuth (v0.4.3), a reference-based cell annotation prediction program  
670 (<https://azimuth.hubmapconsortium.org>), and cells annotated as erythrocytes,  
671 hematopoietic stem cells, innate lymphoid cells, and platelets were excluded. In this  
672 step, the gene annotation “genes shared with humans” (see **Gene annotation and**  
673 **ortholog information**) for each animal species was used. Finally, regarding  
674 genes/cell and counts/cell values, cells with  $>3$  |Z score| were excluded.

675

### 676 **Data integration, visualization, and cell clustering**

677 Data integration, visualization, and cell clustering for each animal species were  
678 performed using the Seurat package. In these processes, the expression levels of  
679 HSV-1 and SeV were not used.

680 Data integration is a method merging the gene expression count matrices  
681 obtained from different experimental conditions while removing batch effects. We  
682 integrated the count matrices from the four different conditions for each animal species.  
683 In the data integration, SCTransform (a modeling framework for the normalization and  
684 variance stabilization of molecular count data from scRNA-seq data) was performed  
685 using the SCTransform function for each count matrix. Next, to extract 2000 genes  
686 with higher variance and thus greater information for integration, the four count  
687 matrices were processed using the SelectIntegrationFeatures function. Next, we used  
688 the PrepSCTIntegration function to transform normalized counts into counts per  
689 10,000 counts in the cell (CP10k). After that, we used the FindIntegrationAnchors  
690 function with the setting Mock as a reference to find “Integration anchors”. Finally, we  
691 integrated the four normalized count matrices using the IntegrateData function with  
692 the option ‘normalization.method=“SCT”’.

693 For visualization, we first performed principal component analysis (PCA) using  
694 the RunPCA function. Then, UMAP<sup>40</sup> was performed with the RunUMAP function. In  
695 this step, principal components (PC) 1-50 were used, and the parameter “n.neighbors”  
696 was set individually for each animal species (Hs: 20, Pt: 20, Mm: 50, and Ra: 40).

697 To define cell clusters in each animal species, we performed graph-based  
698 unsupervised clustering (**Fig. S2A**). First, the FindNeighbors function was used, and  
699 then, the FindClusters function was used. In these steps, the parameter ‘k.param’ for  
700 FindNeighbors was set individually for each animal species (Hs: 12, Pt: 10, Mm: 10,  
701 and Ra: 20). The parameter ‘resolution’ for FindClusters was also set individually for  
702 each animal species (Hs: 2.0, Pt: 2.2, Mm: 1.7, Ra: 1.2).



703

## 704 **Cell annotation**

705 Regarding each cluster identified by graph-based unsupervised clustering in the  
706 section “**Data integration, visualization, and cell clustering**” (**Fig. S2A**), 11 cell  
707 types were manually annotated according to i) the predicted cell type by Azimuth (**Fig.**  
708 **S2B**), ii) the distances between each cluster (**Fig. S2C**), and iii) the correspondence  
709 of clusters between animal species (**Fig. S2D–F**). First, reference-based cell type  
710 prediction was performed using Azimuth for the mock data from each animal species  
711 (**Fig. S2B**). In this step, the gene annotation “genes shared with humans” (see **Gene**  
712 **annotation and ortholog information**) for each animal species was used. We  
713 checked the enrichment of each predicted cell type in each cluster by Azimuth. Second,  
714 we checked the similarities between clusters by hierarchical clustering (**Fig. S2C**)  
715 using the mean values of PCs 1-50 among the individual cells (see **Data integration,**  
716 **visualization, and cell clustering**) in each cluster. Notably, PCA was performed  
717 using the expression levels of “all genes” (see **Gene annotation and ortholog**  
718 **information**). The Euclidian distance was used for clustering by Ward’s method. Third,  
719 to check the correspondence between clusters in each animal species, we performed  
720 data integration, clustering, and visualization for mock data from all four animal  
721 species (**Fig. S2D–F**). In the integration, the mock data from humans were used as  
722 reference data. In this step, the gene annotation “common genes” (see **Gene**  
723 **annotation and ortholog information**) was used.

724 After categorizing cells into 11 cell types, the 11 cell types were coarse-grained  
725 into 6 cell types based on the results of hierarchical clustering analysis (see  
726 **Hierarchical clustering**). The six cell types were used in the subsequent analysis.

727

728

## 729 **Hierarchical clustering**

730 To examine the similarities in expression patterns among the conditions (4 animal  
731 species × 4 stimuli × 6 cell types = 96 conditions), hierarchical clustering analysis was  
732 performed. In this analysis, the 5,000 genes with the highest median absolute  
733 deviation (mad) values were used (**Fig. S2H**). First, the average expression levels of  
734 the respective genes in each condition were calculated. Next, PCA was performed  
735 using the average expression profiles. Third, using PCs 1-30, the distance matrix for

736 the 96 conditions was generated using 1–Pearson’s correlation coefficient. Finally,  
737 hierarchical clustering by Ward’s method was performed using the distance matrix.

738 To determine which factor (e.g., animal species, stimulus, or cell type) was the  
739 most impactful on the gene expression in immune cells, hierarchical clustering was  
740 performed using induction patterns upon stimulation (**Fig. 1E**). Unlike for the results  
741 shown in **Fig. S2H**, FC values were used to perform PCA. This analysis used 7557  
742 genes, the union of the top 6000 genes related to total expression levels in the  
743 expression profiles of each animal species. The FC expression values (stimulated vs.  
744 unstimulated conditions) of those genes were calculated for each cell type in each  
745 animal species. To avoid generating infinite FC values, the data for genes with zero  
746 expression in mock data were set at the minimum nonzero expression level in the  
747 mock data. Finally, hierarchical clustering was performed using the method described  
748 above.

749

### 750 **Tensor decomposition**

751 To extract species-specific/common induction patterns upon stimulation from  
752 transcriptome data with complex structures (4 animal species × 3 stimuli × 4 cell types  
753 × 7557 orthologous genes), we used tensor decomposition (**Fig. 2A**). As the input data  
754 for tensor decomposition, the FC values of 7557 genes, the union of the top 6000  
755 genes related to total expression levels in the expression profiles of each animal, were  
756 used. The calculation method for FC values is described in the section “**Hierarchical**  
757 **clustering**”. The standardized FC values for each condition were represented as a 4-  
758 mode tensor (animal species × stimulus × cell type × orthologous gene). To  
759 perform Tucker decomposition (TD), a method of tensor decomposition, we used  
760 TensorLy (v0.6.0) (<http://tensorly.org/stable/index.html>). We performed TD via higher-  
761 order orthogonal iteration (HOI) with the parameter ‘init=“svd”’. In HOI, the size of the  
762 core tensor (ranks) was set as [animal species: 3, stimulus: 2, cell type: 3, gene: 15].  
763 The number of iterations was set as 100.

764

### 765 **Gene classification using the tensor decomposition results**

766 A schematic of the gene classification using tensor decomposition is shown in **Fig. 2C**  
767 **and Fig. S3C–F**. Briefly, we selected the candidate gene categories that had patterns  
768 of values (high, mid, or low) (**Fig. S3C**) that matched the ideal pattern (**Fig. S3D**) and

769 then selected the gene category with the best “similarity score” (**Fig. S3E**) from the  
770 candidates as the gene category for that gene (**Fig. S3F**).

771 Initially, the product of the core tensor and the three factor-matrices, A2 (for  
772 stimulus), A3 (for cell type), and A4 (for gene), was calculated to obtain three cubic  
773 data with three axes, stimulus, cell type, and gene, using the `ttl` function of `rTensor`  
774 (v1.4.8) (<https://github.com/rikenbit/rTensor>). Each cubic data point indicated  
775 information related to species-common, bat-specific, and macaque-specific factors  
776 (**Fig. 2B**). Next, since the values of latent factors related to HSV-1 and SeV were  
777 similar (**Fig. S3A**), these two categories were integrated into the category “Virus” by  
778 calculating mean values. Additionally, since the values of latent factors related to  
779 NaiveT and KillerTNK were similar (**Fig. S3B**), these two categories of cell types were  
780 integrated into the category “TNK” by calculating mean values. Thus, hereafter, the  
781 category of stimuli included virus and LPS, and the category of cell types included B  
782 cells, TNK cells and Monos.

783 Then, in each cubic data, genes were classified into 11 categories (**Fig. 2C**)  
784 through the following three steps. Briefly, from the candidate gene categories that had  
785 patterns of values (high, mid, or low) (**Fig. S3C**) that matched the ideal pattern (**Fig.**  
786 **S3D**), the gene category with the lowest “similarity score” (**Fig. S3E**) was selected as  
787 the gene category for that gene (**Fig. S3F**).

788 In the first step (**Fig. S3C**), the values in each cubic data were normalized, and  
789 the genes were classified into three classes (high, mid, and low) according to the  
790 ranking of values in each condition (stimulus × cell type). First, six column vectors in  
791 the TD results for the 6 conditions (2 stimuli × 3 cell types) were normalized by dividing  
792 them by the 90th percentile for the individual vectors. After the division step, to  
793 suppress the effect of abnormally high or low values, data with  $> 1$  or  $< -1$  were  
794 assigned as 1 and -1, respectively. Next, the genes were categorized into three  
795 classes based on the rule that if the rank of a value was greater than the 80th  
796 percentile or smaller than the 20th percentile, it was categorized as “high” or “low”,  
797 respectively; otherwise, it was categorized as “mid”.

798 In the second step (**Fig. S3E**), a “similarity score” was calculated to represent  
799 the similarity between the genewise pattern of the TD results and the “ideal patterns”  
800 for each gene category. The “ideal patterns” were defined as vectors composed of 1,  
801 0, and -1 for 16 gene categories (Virus\_high, LPS\_low, Virus\_low, LPS\_high, B\_high,  
802 TNKM\_low, B\_low, TNKM\_high, TNK\_high, BM\_low, TNK\_low, BM\_high, M\_high,

803 BTNK\_low, M\_low, and BTNK\_high) (**Fig. S3D**). The “similarity score” was defined as  
804 the sum of the residual squares between the two vectors, the genewise vector of  
805 normalized values from the TD results (**Fig. S3C**) and the “ideal patterns” (**Fig. S3D**).  
806 According to the definition, the “similarity scores” for every combination of genes and  
807 gene categories were calculated. After calculating all similarity scores, to obtain the  
808 threshold for checking if a gene should be recognized as a gene in that category, the  
809 20th percentile of the similarity score in the vector for each gene category was  
810 calculated.

811 In the third step (**Fig. S3F**), the gene category for each gene was determined.  
812 First, the candidate gene categories for each gene were filtered according to the  
813 pattern assigned in the first step (**Fig. S3C**). If the pattern (high/mid/low) of all 6  
814 conditions was high or low, the gene was categorized as ALL\_high or ALL\_low,  
815 respectively. If the pattern of a gene matched the “ideal pattern” of a gene category,  
816 the gene category was added as a candidate gene category for the gene. For example,  
817 if the pattern of gene A was (Virus\_B: high, Virus\_TNK: high, Virus\_M: high, LPS\_B:  
818 high, LPS\_TNK: low, LPS\_M: mid), the candidate gene category for gene A was  
819 “Virus\_high” and “B\_high” because all virus-infected data were assigned as “high” and  
820 all B-cell data were assigned as “high” (**Fig. S3D**). Second, the gene category with the  
821 lowest “similarity score” among the candidate gene categories was selected as the  
822 tentative gene category. In this selection, if the “similarity score” was higher than the  
823 threshold of the gene category (**Fig. S3E**), the gene was categorized as “Others” (See  
824 gene B in **Fig. S3F**) because the pattern for the gene was recognized as being too  
825 different from the “ideal pattern”. If no candidate gene category was available, the gene  
826 was also classified as “Others” (See gene C in **Fig. S3F**). Finally, the final gene  
827 category was determined by integrating similar gene categories (**Fig. S3F**). For  
828 instance, the categories Virus\_high and LPS\_low were integrated into the category  
829 Virus\_high because both categories indicated that virus-infected data were higher than  
830 LPS-stimulated data (See gene D in **Fig. S3F**). As a result of the gene classification  
831 process, genes were categorized into one of 11 categories (**Fig. 2C, S3D**).

832

### 833 **GO term enrichment analysis**

834 Gene Ontology (GO) analysis was performed with Fisher’s exact test. This analysis  
835 used the GO canonical pathways and GO biological processes defined by MSigDB

836 (v7.3) (<https://www.gsea-msigdb.org/gsea/msigdb/collections.jsp>). Adjusted P values  
837 were calculated using the Benjamini–Hochberg (BH) method.

838

### 839 **Calculation of gene set variation analysis (GSVA) scores**

840 The gene set-wise expression scores used in **Figs. 3A, 4B, 4C, and S4B** were  
841 calculated using GSVA (v1.38.2)<sup>41</sup> with the algorithm “ssgsea”.

842

### 843 **Identification of differentially expressed genes (DEGs) and marker genes**

844 In bat monocytes, DEGs were identified in Cluster 5 or Cluster 7 compared to the other  
845 clusters using the FindMarkers function of Seurat packages. A gene that met the  
846 following three criteria was considered a DEG: 1) the false discovery rate (FDR)  
847 calculated using the BH method was less than 0.05, 2) the average log<sub>2</sub>FC was  
848 greater than 1 or less than -1, and 3) the proportion of expressing cells was greater  
849 than 0.2.

850 The marker genes of Cluster 5 and Cluster 7 of bat monocytes (RaC5marker  
851 and RaC7marker, respectively) were defined as upregulated DEGs in Cluster 5 (**Fig.**  
852 **4E**) and Cluster 7 (**Fig. 4G**), respectively.

853

854

### 855 **[Supplemental Information]**

856

### 857 **Figure S1. Validation of viral infectivity and the innate immune response (related** 858 **to Figure 1)**

859 (A) Heatmap of the induction levels of genes related to the IFN response and  
860 inflammation. The rows indicate genes, and the columns indicate combinations of  
861 species, stimulus, and dose. The color represents the log<sub>2</sub> Fold Change of ddCt upon  
862 stimulation measured by qRT–PCR. “rep. 1” and “rep. 2” indicate biological replicates.

863 (B-C) Heatmap of the expression levels of viral genes (B: HSV-1; C: SeV) measured  
864 by qRT–PCR. The rows indicate viral genes, and the columns indicate combinations  
865 of species and doses. “rep. 1” and “rep. 2” indicate biological replicates. The color  
866 represents the ddCt values based on the expression levels of GAPDH.

867 (D-G) Violin plots of (D) the numbers of detected genes per cell before QC, (E)  
868 numbers of counted reads per cell before QC, (F) numbers of detected genes per cell  
869 after QC, and (G) numbers of counted reads per cell after QC.

870

871 **Figure S2. Heterogeneous expression patterns in the four animal species**  
872 **(related to Figure 1)**

873 (A-B) UMAP plots representing the gene expression patterns of PBMCs from the four  
874 species. Each dot is colored according to the results of unsupervised clustering (A)  
875 and reference-based label transfer (B).

876 (C) Heatmaps showing pairwise Euclid distances representing the gene expression  
877 differences among clusters. The distances were calculated using PCs 1-50 of the gene  
878 expression data.

879 (D-E) UMAP plots representing the gene expression patterns of PBMCs from the mock  
880 samples for the four species. Each dot is colored according to the results of  
881 unsupervised clustering using the integrated data for the four mock samples (D) or the  
882 four samples from each animal shown in **Figure S2A** (E).

883 (F) Heatmaps showing pairwise Euclid distances representing the gene expression  
884 differences among clusters shown in **Figure S2D**. The distances were calculated  
885 using PCs 1-30 of the gene expression data.

886 (G) Dot plots representing the expression patterns of marker genes for each cell type  
887 defined by Azimuth  
888 ([azimuth.hubmapconsortium.org/references/#Human%20-%20PBMC](https://azimuth.hubmapconsortium.org/references/#Human%20-%20PBMC))

889 (H) Hierarchical clustering analysis of 48 pseudobulked FC gene expression  
890 datapoints (4 animal species x 4 stimuli x 11 cell types = 176 conditions).

891

892 **Figure S3. Classification of genes according to species-specific expression**  
893 **patterns (related to Figure 2)**

894 (A) Heatmap representing a latent factor matrix related to stimuli. The columns indicate  
895 stimuli, and the rows indicate latent factors representing stimulus-common (L2\_1) and  
896 virus vs. LPS (L2\_2) factors.

897 (B) Heatmap representing a latent factor matrix related to cell types. The columns  
898 indicate cell types, and the rows indicate latent factors representing cell type-common  
899 (L3\_1), monocyte-specific (L3\_2), and B-cell-specific (L1\_3) factors.

900 (C) Summary of the normalization of values and patterning according to the ranking of  
901 the values. First, six column vectors (2 stimuli x 3 cell types) in the TD results were  
902 normalized by dividing them by the 90th percentile of the individual vectors. Then, data  
903 with  $> 1$  or  $< -1$  were assigned as 1 and -1, respectively. Next, the genes were

904 categorized into three classes (high, mid, and low) based on the rule that if the rank of  
905 a value was greater than the 80th percentile or smaller than the 20th percentile, it was  
906 categorized as “high” or “low”, respectively; otherwise, it was categorized as “mid”.

907 (D) Summary of the ideal patterns for each gene category used in the gene  
908 classification in **Figure 2C**.

909 (E) Summary of the calculation of the similarity score and establishment of the  
910 threshold for the gene classification in **Fig. S3F**. The sum of the residual squares  
911 between two vectors, the genewise vector of normalized values from the TD results  
912 (**Fig. S3C**) and the “ideal patterns” (**Fig. S3D**) were calculated. Then, the threshold  
913 used in **Fig. S3F** was obtained by calculating the 20th percentile of the similarity score  
914 for the vector for each gene category.

915 (F) Summary of gene classification. By comparing patterns from the TD results (**Fig.**  
916 **S3C**) and the ideal patterns (**Fig. S3D**), candidate gene categories were selected.  
917 Next, the gene category with the lowest “similarity score” among the candidate gene  
918 categories was selected as the tentative gene category. In this selection, if the  
919 “similarity score” was higher than the threshold of the gene category (**Fig. S3E**), the  
920 gene was categorized as “Others” (gene B). If no candidate gene category was  
921 available, the gene was also classified as “Others” (gene C). Finally, the final gene  
922 category was determined by integrating similar gene categories (genes A and D).

923 (G-I) Heatmap representing the values of the products calculated in **Figure 2C**. The  
924 data relating to (G) the species-common factor (L1\_1), (H) the bat-specific factor  
925 (L1\_2), and (I) the macaque-specific factor (L1\_3) are shown. Each row indicates the  
926 respective gene. The color keys shown on the right of the heatmap indicate gene  
927 categories.

928 (J-L) Heatmap representing the FC values in the input tensor. The orders of the rows  
929 are the same as in (J) **Figure S3G**, (K) **Figure S3H**, and (L) **Figure S3I**. Each row  
930 indicates the respective gene. The color keys shown on the right of the heatmap  
931 indicate gene categories.

932

#### 933 **Figure S4. Identification of species-specific cell types (related to Figure 4)**

934 (A) UMAP plots representing the expression patterns of every single cell.  
935 Dimensionality reduction was performed for each combination of the four species and  
936 three cell types.

937 (B) UMAP plots representing the average expression levels of marker genes for  
938 Cluster 7 [C7markers].

939

940 **Table. S1. Primers used for RT-qPCR (related to the Methods)**

941 The sequences of the primers used for RT-qPCR are listed.

942

943

944

References

945

946 1. Huff, J.L., and Barry, P.A. (2003). B-virus (Cercopithecine herpesvirus 1)  
947 infection in humans and macaques: potential for zoonotic disease. *Emerg Infect*  
948 *Dis* 9, 246-250. 10.3201/eid0902.020272.

949 2. Letko, M., Seifert, S.N., Olival, K.J., Plowright, R.K., and Munster, V.J. (2020).  
950 Bat-borne virus diversity, spillover and emergence. *Nat Rev Microbiol* 18, 461-  
951 471. 10.1038/s41579-020-0394-z.

952 3. Towner, J.S., Amman, B.R., Sealy, T.K., Carroll, S.A., Comer, J.A., Kemp, A.,  
953 Swanepoel, R., Paddock, C.D., Balinandi, S., Khristova, M.L., et al. (2009).  
954 Isolation of genetically diverse Marburg viruses from Egyptian fruit bats. *PLoS*  
955 *Pathog* 5, e1000536. 10.1371/journal.ppat.1000536.

956 4. Guito, J.C., Prescott, J.B., Arnold, C.E., Amman, B.R., Schuh, A.J., Spengler,  
957 J.R., Sealy, T.K., Harmon, J.R., Coleman-McCray, J.D., Kulcsar, K.A., et al.  
958 (2021). Asymptomatic Infection of Marburg Virus Reservoir Bats Is Explained  
959 by a Strategy of Immunoprotective Disease Tolerance. *Curr Biol* 31, 257-  
960 270.e255. 10.1016/j.cub.2020.10.015.

961 5. Akira, S., Uematsu, S., and Takeuchi, O. (2006). Pathogen recognition and  
962 innate immunity. *Cell* 124, 783-801. 10.1016/j.cell.2006.02.015.

963 6. Takeuchi, O., and Akira, S. (2010). Pattern recognition receptors and  
964 inflammation. *Cell* 140, 805-820. 10.1016/j.cell.2010.01.022.

965 7. Hansen, J.D., Vojtech, L.N., and Laing, K.J. (2011). Sensing disease and  
966 danger: a survey of vertebrate PRRs and their origins. *Dev Comp Immunol* 35,  
967 886-897. 10.1016/j.dci.2011.01.008.

968 8. Lu, Y., Su, F., Li, Q., Zhang, J., Li, Y., Tang, T., Hu, Q., and Yu, X.Q. (2020).  
969 Pattern recognition receptors in *Drosophila* immune responses. *Dev Comp*  
970 *Immunol* 102, 103468. 10.1016/j.dci.2019.103468.



- 971 9. Dempsey, A., and Bowie, A.G. (2015). Innate immune recognition of DNA: A  
972 recent history. *Virology* 479-480, 146-152. 10.1016/j.virol.2015.03.013.
- 973 10. Poltorak, A., He, X., Smirnova, I., Liu, M.Y., Van Huffel, C., Du, X., Birdwell, D.,  
974 Alejos, E., Silva, M., Galanos, C., et al. (1998). Defective LPS signaling in  
975 C3H/HeJ and C57BL/10ScCr mice: mutations in Tlr4 gene. *Science* 282, 2085-  
976 2088. 10.1126/science.282.5396.2085.
- 977 11. Schountz, T., Baker, M.L., Butler, J., and Munster, V. (2017). Immunological  
978 Control of Viral Infections in Bats and the Emergence of Viruses Highly  
979 Pathogenic to Humans. *Front Immunol* 8, 1098. 10.3389/fimmu.2017.01098.
- 980 12. Gorbunova, V., Seluanov, A., and Kennedy, B.K. (2020). The World Goes Bats:  
981 Living Longer and Tolerating Viruses. *Cell Metab* 32, 31-43.  
982 10.1016/j.cmet.2020.06.013.
- 983 13. Banerjee, A., Baker, M.L., Kulcsar, K., Misra, V., Plowright, R., and Mossman,  
984 K. (2020). Novel Insights Into Immune Systems of Bats. *Front Immunol* 11, 26.  
985 10.3389/fimmu.2020.00026.
- 986 14. Pavlovich, S.S., Lovett, S.P., Koroleva, G., Guito, J.C., Arnold, C.E., Nagle,  
987 E.R., Kulcsar, K., Lee, A., Thibaud-Nissen, F., Hume, A.J., et al. (2018). The  
988 Egyptian Rousette Genome Reveals Unexpected Features of Bat Antiviral  
989 Immunity. *Cell* 173, 1098-1110.e1018. 10.1016/j.cell.2018.03.070.
- 990 15. Zhou, P., Tachedjian, M., Wynne, J.W., Boyd, V., Cui, J., Smith, I., Cowled, C.,  
991 Ng, J.H., Mok, L., Michalski, W.P., et al. (2016). Contraction of the type I IFN  
992 locus and unusual constitutive expression of IFN- $\alpha$  in bats. *Proc Natl Acad Sci*  
993 *U S A* 113, 2696-2701. 10.1073/pnas.1518240113.
- 994 16. Xie, J., Li, Y., Shen, X., Goh, G., Zhu, Y., Cui, J., Wang, L.F., Shi, Z.L., and  
995 Zhou, P. (2018). Dampened STING-Dependent Interferon Activation in Bats.  
996 *Cell Host Microbe* 23, 297-301.e294. 10.1016/j.chom.2018.01.006.
- 997 17. Ahn, M., Cui, J., Irving, A.T., and Wang, L.F. (2016). Unique Loss of the PYHIN  
998 Gene Family in Bats Amongst Mammals: Implications for Inflammasome  
999 Sensing. *Sci Rep* 6, 21722. 10.1038/srep21722.
- 1000 18. Irving, A.T., Zhang, Q., Kong, P.S., Luko, K., Rozario, P., Wen, M., Zhu, F.,  
1001 Zhou, P., Ng, J.H.J., Sobota, R.M., and Wang, L.F. (2020). Interferon  
1002 Regulatory Factors IRF1 and IRF7 Directly Regulate Gene Expression in Bats  
1003 in Response to Viral Infection. *Cell Rep* 33, 108345.  
1004 10.1016/j.celrep.2020.108345.

- 1005 19. De La Cruz-Rivera, P.C., Kanchwala, M., Liang, H., Kumar, A., Wang, L.F.,  
1006 Xing, C., and Schoggins, J.W. (2018). The IFN Response in Bats Displays  
1007 Distinctive IFN-Stimulated Gene Expression Kinetics with Atypical RNASEL  
1008 Induction. *J Immunol* 200, 209-217. 10.4049/jimmunol.1701214.
- 1009 20. Lin, H.H., Horie, M., and Tomonaga, K. (2022). A comprehensive profiling of  
1010 innate immune responses in *Eptesicus* bat cells. *Microbiol Immunol* 66, 97-112.  
1011 10.1111/1348-0421.12952.
- 1012 21. Ahn, M., Anderson, D.E., Zhang, Q., Tan, C.W., Lim, B.L., Luko, K., Wen, M.,  
1013 Chia, W.N., Mani, S., Wang, L.C., et al. (2019). Dampened NLRP3-mediated  
1014 inflammation in bats and implications for a special viral reservoir host. *Nat*  
1015 *Microbiol* 4, 789-799. 10.1038/s41564-019-0371-3.
- 1016 22. Goh, G., Ahn, M., Zhu, F., Lee, L.B., Luo, D., Irving, A.T., and Wang, L.F. (2020).  
1017 Complementary regulation of caspase-1 and IL-1 $\beta$  reveals additional  
1018 mechanisms of dampened inflammation in bats. *Proc Natl Acad Sci U S A* 117,  
1019 28939-28949. 10.1073/pnas.2003352117.
- 1020 23. Friedrichs, V., Toussaint, C., Schäfer, A., Rissmann, M., Dietrich, O.,  
1021 Mettenleiter, T.C., Pei, G., Balkema-Buschmann, A., Saliba, A.E., and Dorhoi,  
1022 A. (2022). Landscape and age dynamics of immune cells in the Egyptian  
1023 rousette bat. *Cell Rep* 40, 111305. 10.1016/j.celrep.2022.111305.
- 1024 24. Banerjee, A., Rapin, N., Bollinger, T., and Misra, V. (2017). Lack of  
1025 inflammatory gene expression in bats: a unique role for a transcription  
1026 repressor. *Sci Rep* 7, 2232. 10.1038/s41598-017-01513-w.
- 1027 25. Shaw, A.E., Hughes, J., Gu, Q., Behdenna, A., Singer, J.B., Dennis, T., Orton,  
1028 R.J., Varela, M., Gifford, R.J., Wilson, S.J., and Palmarini, M. (2017).  
1029 Fundamental properties of the mammalian innate immune system revealed by  
1030 multispecies comparison of type I interferon responses. *PLoS Biol* 15,  
1031 e2004086. 10.1371/journal.pbio.2004086.
- 1032 26. Sato, R., Kato, A., Chimura, T., Saitoh, S.I., Shibata, T., Murakami, Y., Fukui,  
1033 R., Liu, K., Zhang, Y., Aii, J., et al. (2018). Combating herpesvirus encephalitis  
1034 by potentiating a TLR3-mTORC2 axis. *Nat Immunol* 19, 1071-1082.  
1035 10.1038/s41590-018-0203-2.
- 1036 27. Shah, S., King, E.M., Chandrasekhar, A., and Newton, R. (2014). Roles for the  
1037 mitogen-activated protein kinase (MAPK) phosphatase, DUSP1, in feedback

- 1038 control of inflammatory gene expression and repression by dexamethasone. *J*  
1039 *Biol Chem* 289, 13667-13679. 10.1074/jbc.M113.540799.
- 1040 28. Li, Q.J., Chau, J., Ebert, P.J., Sylvester, G., Min, H., Liu, G., Braich, R.,  
1041 Manoharan, M., Soutschek, J., Skare, P., et al. (2007). miR-181a is an intrinsic  
1042 modulator of T cell sensitivity and selection. *Cell* 129, 147-161.  
1043 10.1016/j.cell.2007.03.008.
- 1044 29. Posselt, G., Schwarz, H., Duschl, A., and Horejs-Hoeck, J. (2011). Suppressor  
1045 of cytokine signaling 2 is a feedback inhibitor of TLR-induced activation in  
1046 human monocyte-derived dendritic cells. *J Immunol* 187, 2875-2884.  
1047 10.4049/jimmunol.1003348.
- 1048 30. Seal, S., Dharmarajan, G., and Khan, I. (2021). Evolution of pathogen tolerance  
1049 and emerging infections: A missing experimental paradigm. *Elife* 10.  
1050 10.7554/eLife.68874.
- 1051 31. Lafaille, F.G., Pessach, I.M., Zhang, S.Y., Ciancanelli, M.J., Herman, M.,  
1052 Abhyankar, A., Ying, S.W., Keros, S., Goldstein, P.A., Mostoslavsky, G., et al.  
1053 (2012). Impaired intrinsic immunity to HSV-1 in human iPSC-derived TLR3-  
1054 deficient CNS cells. *Nature* 491, 769-773. 10.1038/nature11583.
- 1055 32. López-Cotarelo, P., Gómez-Moreira, C., Criado-García, O., Sánchez, L., and  
1056 Rodríguez-Fernández, J.L. (2017). Beyond Chemoattraction: Multifunctionality  
1057 of Chemokine Receptors in Leukocytes. *Trends Immunol* 38, 927-941.  
1058 10.1016/j.it.2017.08.004.
- 1059 33. Ejercito, P.M., Kieff, E.D., and Roizman, B. (1968). Characterization of herpes  
1060 simplex virus strains differing in their effects on social behaviour of infected cells.  
1061 *J Gen Virol* 2, 357-364. 10.1099/0022-1317-2-3-357.
- 1062 34. Yoshida, A., Kawabata, R., Honda, T., Sakai, K., Ami, Y., Sakaguchi, T., and  
1063 Irie, T. (2018). A Single Amino Acid Substitution within the Paramyxovirus  
1064 Sendai Virus Nucleoprotein Is a Critical Determinant for Production of  
1065 Interferon-Beta-Inducing Copyback-Type Defective Interfering Genomes. *J*  
1066 *Virol* 92. 10.1128/jvi.02094-17.
- 1067 35. Kiyotani, K., Sakaguchi, T., Kato, A., Nagai, Y., and Yoshida, T. (2007).  
1068 Paramyxovirus Sendai virus V protein counteracts innate virus clearance  
1069 through IRF-3 activation, but not via interferon, in mice. *Virology* 359, 82-91.  
1070 10.1016/j.virol.2006.08.053.

- 1071 36. Yamada, E., Nakaoka, S., Klein, L., Reith, E., Langer, S., Hopfensperger, K.,  
1072 Iwami, S., Schreiber, G., Kirchhoff, F., Koyanagi, Y., et al. (2018). Human-  
1073 Specific Adaptations in Vpu Conferring Anti-tetherin Activity Are Critical for  
1074 Efficient Early HIV-1 Replication In Vivo. *Cell Host Microbe* 23, 110-120.e117.  
1075 10.1016/j.chom.2017.12.009.
- 1076 37. Jebb, D., Huang, Z., Pippel, M., Hughes, G.M., Lavrichenko, K., Devanna, P.,  
1077 Winkler, S., Jermini, L.S., Skirmuntt, E.C., Katzourakis, A., et al. (2020). Six  
1078 reference-quality genomes reveal evolution of bat adaptations. *Nature* 583,  
1079 578-584. 10.1038/s41586-020-2486-3.
- 1080 38. Quinlan, A.R., and Hall, I.M. (2010). BEDTools: a flexible suite of utilities for  
1081 comparing genomic features. *Bioinformatics* 26, 841-842.  
1082 10.1093/bioinformatics/btq033.
- 1083 39. Hao, Y., Hao, S., Andersen-Nissen, E., Mauck, W.M., 3rd, Zheng, S., Butler, A.,  
1084 Lee, M.J., Wilk, A.J., Darby, C., Zager, M., et al. (2021). Integrated analysis of  
1085 multimodal single-cell data. *Cell* 184, 3573-3587.e3529.  
1086 10.1016/j.cell.2021.04.048.
- 1087 40. McInnes, L., Healy, J., and Melville, J. (2018). UMAP: Uniform Manifold  
1088 Approximation and Projection for Dimension Reduction. arXiv:1802.03426.
- 1089 41. Hänzelmann, S., Castelo, R., and Guinney, J. (2013). GSVA: gene set variation  
1090 analysis for microarray and RNA-seq data. *BMC Bioinformatics* 14, 7.  
1091 10.1186/1471-2105-14-7.  
1092

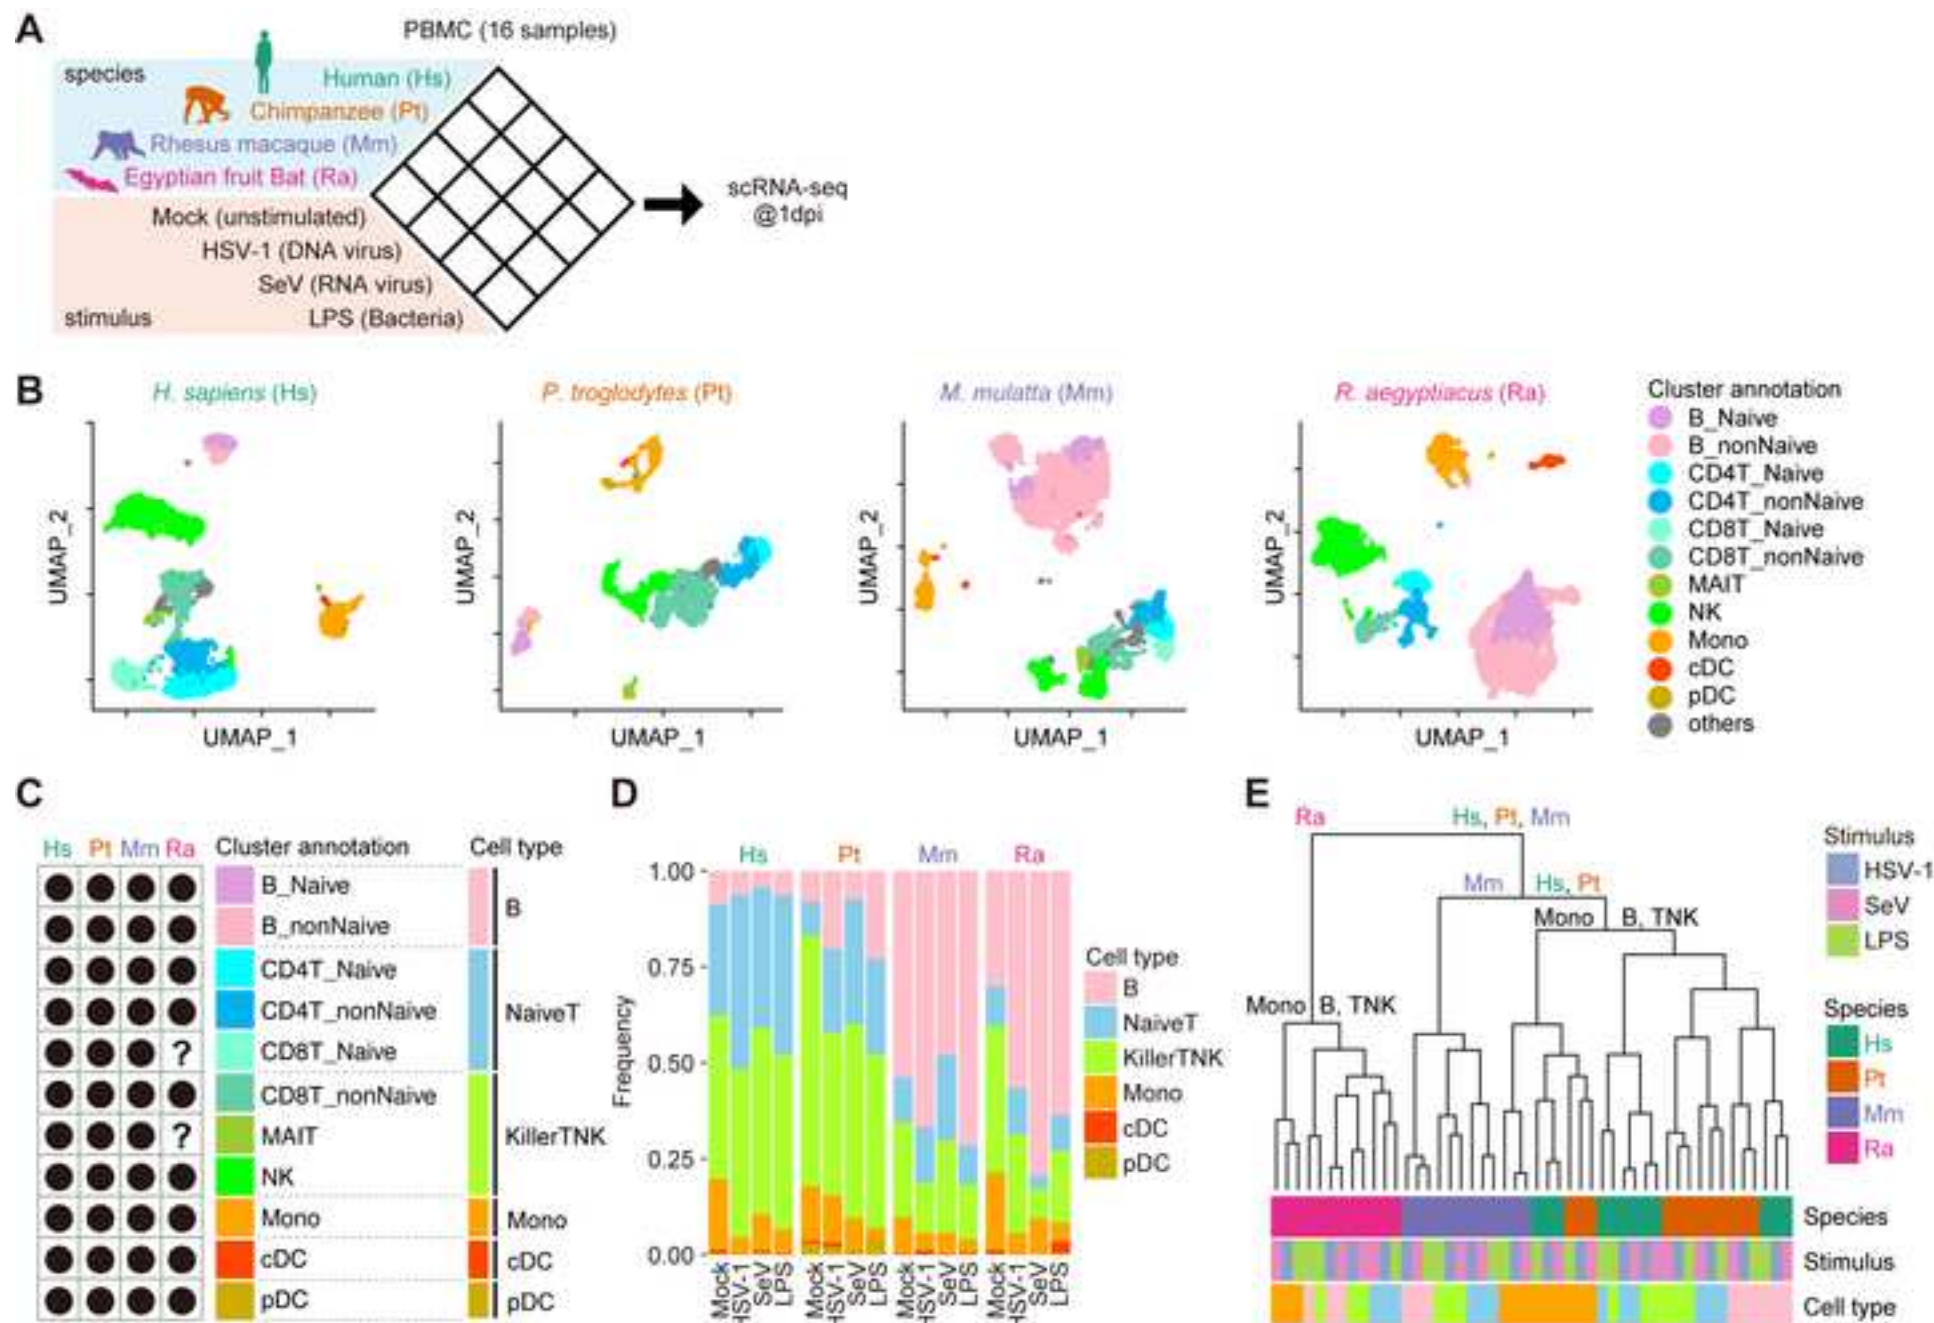

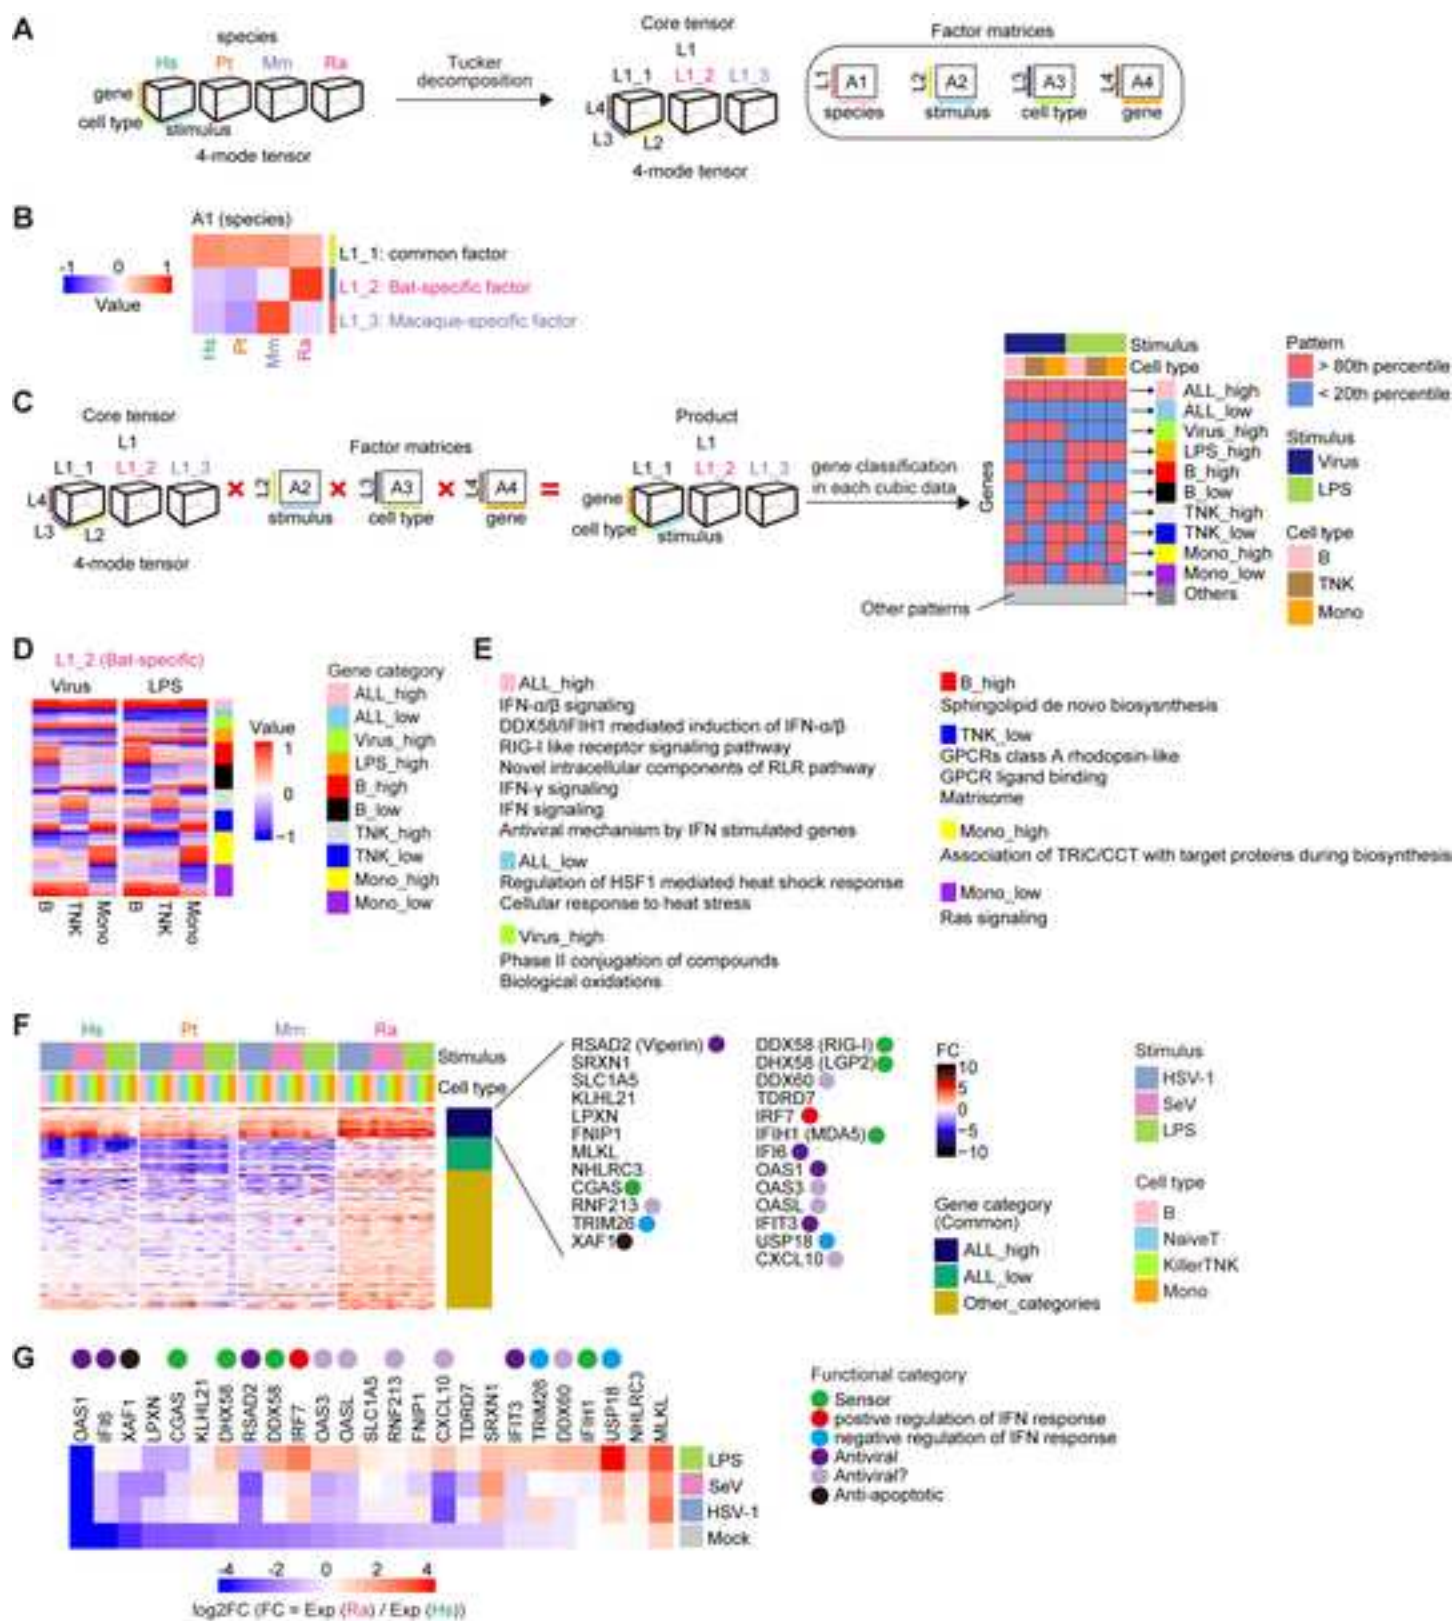

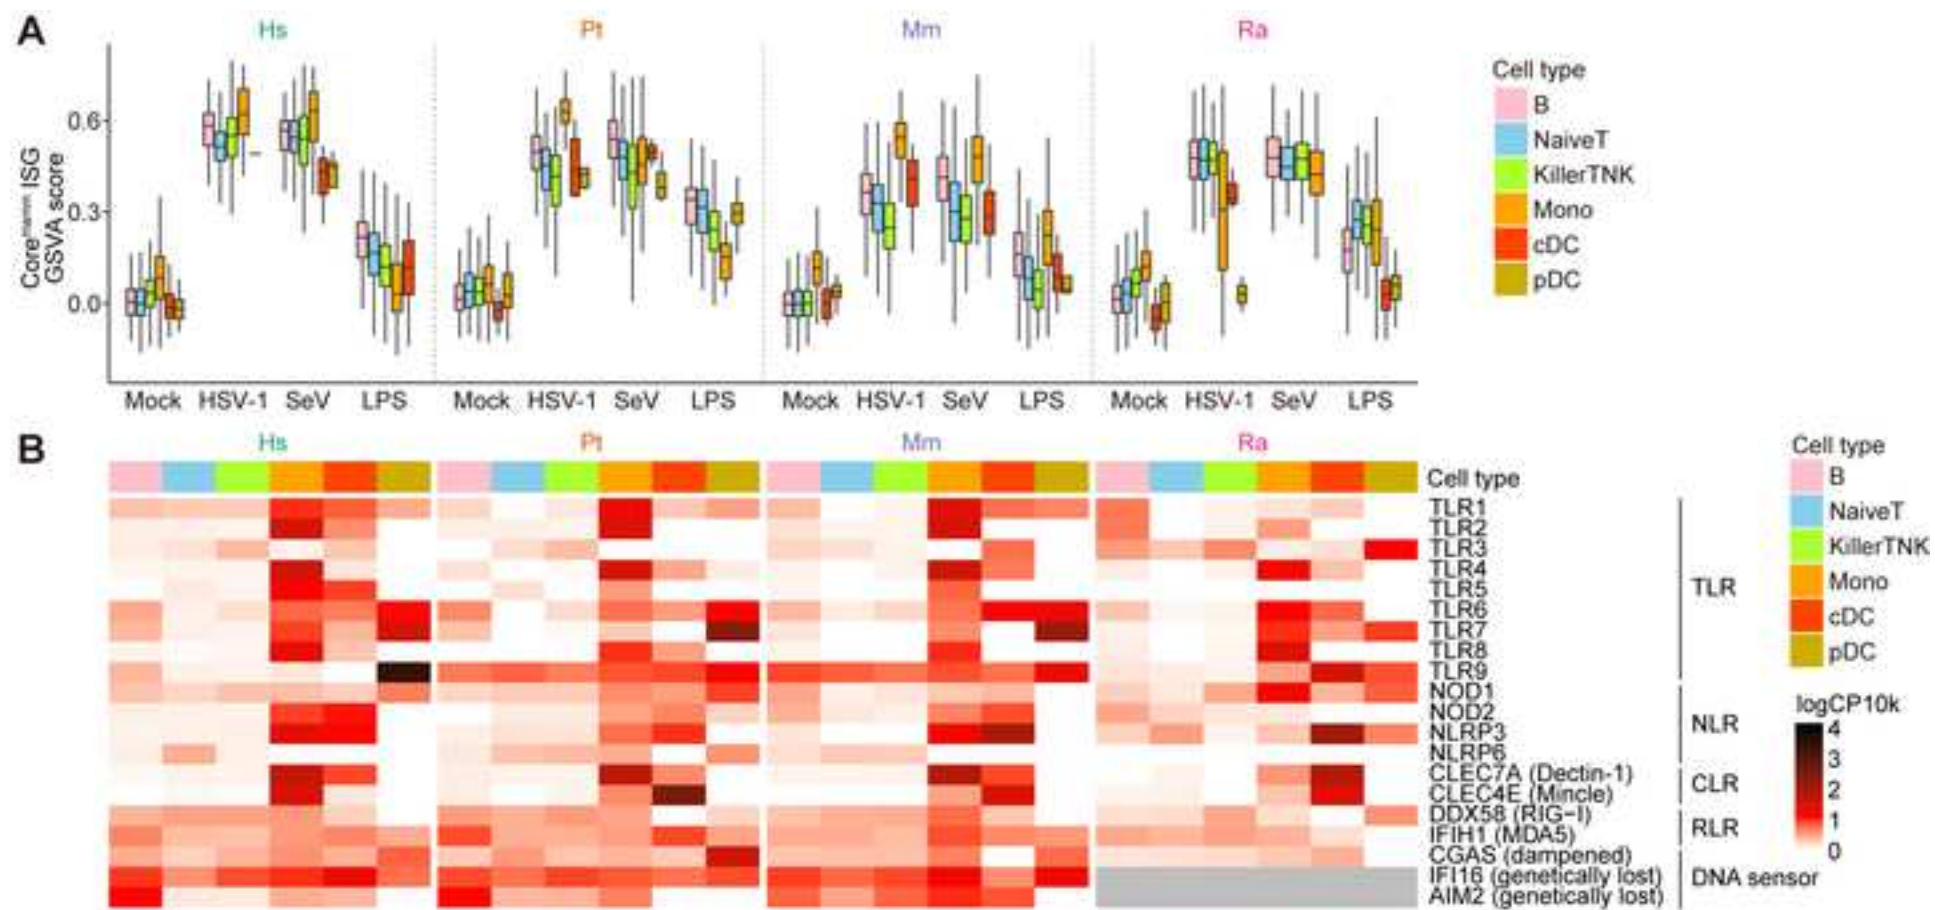

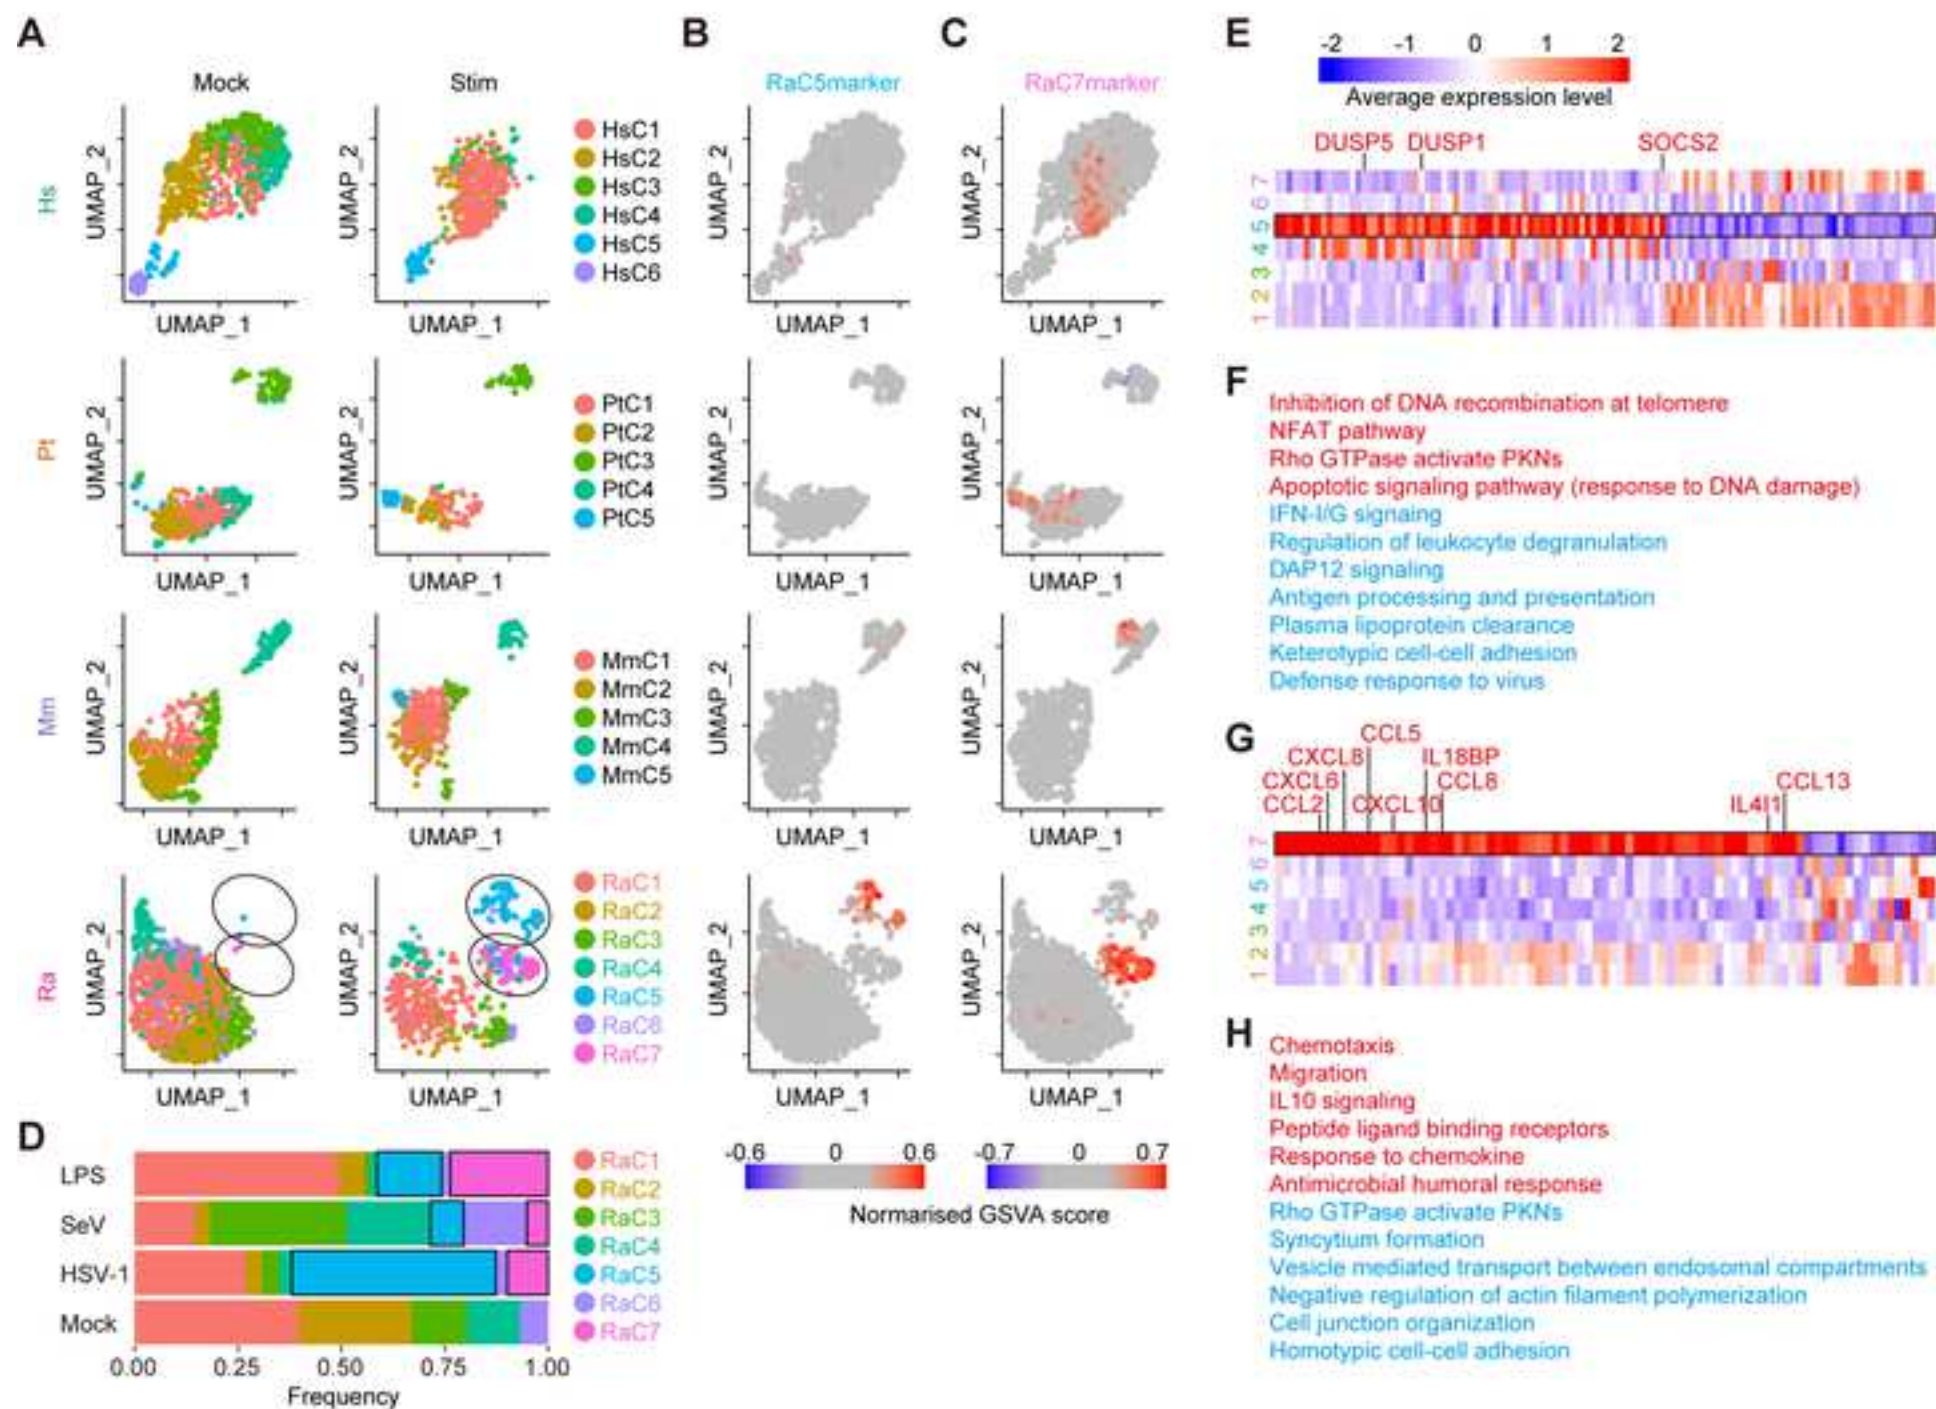



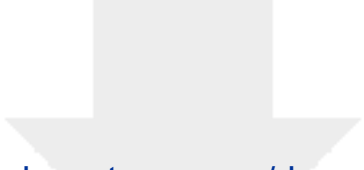

Click here to access/download  
**Supplementary Material**  
TableS1.xlsx





Click here to access/download  
**Supplementary Material**  
FigS1.tif



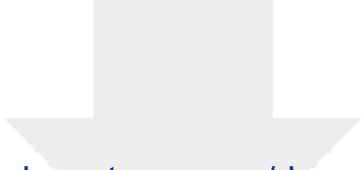

Click here to access/download  
**Supplementary Material**  
FigS2.tif





Click here to access/download  
**Supplementary Material**  
FigS3.tif



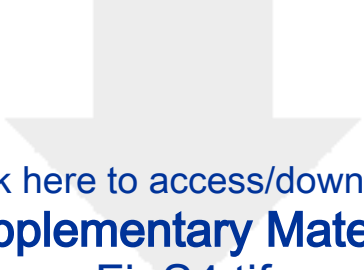

Click here to access/download  
**Supplementary Material**  
FigS4.tif



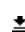

January 11, 2023

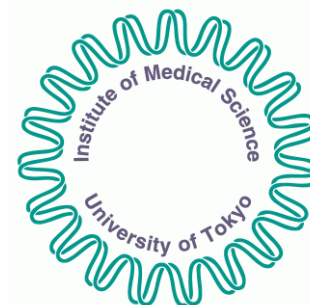

Dear Editors, **GigaScience**

Please find enclosed our manuscript entitled "**Single-cell transcriptome analysis illuminating the characteristics of species-specific innate immune responses against viral infections**", by Aso et al., for the consideration of publication in **GigaScience**.

As a background of this study - it is well known that bats harbor various viruses without severe symptoms and act as their natural reservoirs. The tolerance of bats against viral infections is assumed to originate from the uniqueness of their immune system. However, how immune responses vary between primates and bats remains unclear. To characterize differences in the immune responses among different mammals, we obtained peripheral blood mononuclear cells from three primates (humans, chimpanzees, and macaques) and a bat species (Egyptian fruit bat) and added various pathogenic stimuli. Then, we conducted single-cell RNA sequencing analysis. We show that the induction patterns of key cytosolic DNA/RNA sensors and antiviral genes differed between primates and bats, rather than the difference of pathogenic stimuli. Notably, a novel subset of monocytes induced by pathogenic stimuli specifically in bats was identified. Furthermore, bats robustly responded to DNA virus infection even though major DNA sensors are dampened in bats. Overall, our data suggest that immune responses are substantially different between primates and bats, presumably underlying the difference in viral pathogenicity among the mammalian species tested.

The potential reviewers are listed in the next page. We hope the editor considers that our study is significant and suitable for the publication in **GigaScience**.

Sincerely,

Kei

\*\*\*\*\*  
Kei Sato, Ph.D.  
Professor, Division of Systems Virology, Institute of Medical Science, The University of Tokyo, Japan.  
Email: [KeiSato@g.ecc.u-tokyo.ac.jp](mailto:KeiSato@g.ecc.u-tokyo.ac.jp)  
\*\*\*\*\*

We would recommend the following scientists to review our manuscript:

**Y-h Taguchi** | Professor, Chuo University, Japan

[tag@granular.com](mailto:tag@granular.com)

Expertise: tensor, bioinformatics

**Lin-Fa Wang** | Professor, Duke-NUS Medical School, Singapore

[linfa.wang@duke-nus.edu.sg](mailto:linfa.wang@duke-nus.edu.sg)

Expertise: zoonotic viruses, bat immunology, COVID

**Aaron T. Irving** | Principal Investigator, Zhejiang University School of Medicine, China

[aaronirving@intl.zju.edu.cn](mailto:aaronirving@intl.zju.edu.cn)

Expertise: zoonotic viruses, bat immunology, COVID

**David Robertson** | Professor, University of Glasgow, UK

[David.L.Robertson@glasgow.ac.uk](mailto:David.L.Robertson@glasgow.ac.uk)

Expertise: virus-host interaction, viral evolution

**Olivier Schwartz** | Professor, Pasteur Institute, France

[olivier.schwartz@pasteur.fr](mailto:olivier.schwartz@pasteur.fr)

Expertise: virus-host interaction, HIV, COVID

**Søren R Paludan** | Professor, Aarhus University, Denmark

[srp@biomed.au.dk](mailto:srp@biomed.au.dk)

Expertise: innate immunity, virus-host interaction

**Matteo Iannacone** | Professor, San Raffaele Scientific Institute, Italy

[iannacone.matteo@hsr.it](mailto:iannacone.matteo@hsr.it)

Expertise: innate immunity, virus-host interaction

**Aaron S. Meyer** | Principal Investigator, University of California, USA

[a@asmlab.org](mailto:a@asmlab.org)

Expertise: immune cell communication, multidimensional data analysis

We would like to ask to exclude the following scientists because of potential competition:

**Peng Zhou** | Professor, Wuhan Institute of Virology, China

**Zheng-Li Shi** | Professor, Wuhan Institute of Virology, China

**Anca Dorhoi** | Professor, Friedrich-Loeffler-Institut, Germany

**Antoine-Emmanuel Saliba** | Principal Investigator, Helmholtz Center for Infection Research, Germany

**Jonathan S. Towner** | Principal Investigator, Centers for Disease Control and Prevention, USA

**Mariano Sanchez-Lockhart** | Principal Investigator, USAMRIID, USA
